# Supplementary material
Source: PubMed Central journal article supplement (PMC8908850)

**Disclosure Purpose:** 21-18691

**Summary of Interests**

I do not have any interests to disclose at this time.

**Additional Questions:**

- 1. **Are there other relationships or activities that readers could perceive to have influenced, or that give the appearance of potentially influencing, what you wrote in the submitted work?**  
No.
- 2. **What is the manuscript title?**  
Durability of Protection Against Future SARS-CoV-2 Infection Following Vaccination and Prior Infection in UK Healthcare Workers (the SIREN Cohort)
- 3. **Are you the corresponding author?**  
No.

**Certification**

I certify that the information provided in this disclosure is complete and accurate.

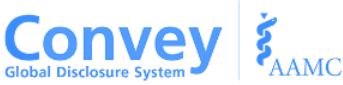

# Tim Brooks

Disclosure Purpose: 21-18691

## Summary of Interests

### Company or Organization

| Entity | Type             | Interest Held By |
|--------|------------------|------------------|
| NIHR   | Grant / Contract | Self             |

*Recipient Name:* Susan Hopkins

*Grant / Contract Description:* Institutional Grant to UK Health Security Agency for Project SIREN, a prospective study of COVID19

*Recipient Type:* Institution

*Grant / Contract Purpose:* Research

*Additional Information:* No direct payment: this is part of my professional duties. Payment to UKHSA covers additional costs of study.

## Additional Questions:

- Are there other relationships or activities that readers could perceive to have influenced, or that give the appearance of potentially influencing, what you wrote in the submitted work?**  
No.
- What is the manuscript title?**  
Durability of Protection Against Future SARS-CoV-2 Infection Following Vaccination and Prior Infection in UK Healthcare Workers (the SIREN Cohort)
- Are you the corresponding author?**  
No.

## Certification

I certify that the information provided in this disclosure is complete and accurate.

**Disclosure Purpose:** 21-18691

**Summary of Interests**

I do not have any interests to disclose at this time.

**Additional Questions:**

- 1. **Are there other relationships or activities that readers could perceive to have influenced, or that give the appearance of potentially influencing, what you wrote in the submitted work?**  
No.
- 2. **What is the manuscript title?**  
Durability of Protection Against Future SARS-CoV-2 Infection Following Vaccination and Prior Infection in UK Healthcare Workers (the SIREN Cohort)
- 3. **Are you the corresponding author?**  
No.

**Certification**

I certify that the information provided in this disclosure is complete and accurate.

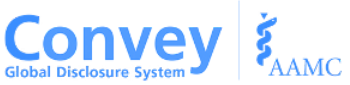

**Disclosure Purpose:** 21-18691

### Summary of Interests

I do not have any interests to disclose at this time.

### Additional Questions:

- Are there other relationships or activities that readers could perceive to have influenced, or that give the appearance of potentially influencing, what you wrote in the submitted work?**  
No.
- What is the manuscript title?**  
Durability of protection against future SARS-CoV-2 infection following vaccination and prior infection in UK healthcare workers (the SIREN cohort) (21-18691)
- Are you the corresponding author?**  
No.

### Certification

I certify that the information provided in this disclosure is complete and accurate.

**Disclosure Purpose:** 21-18691

Summary of Interests

I do not have any interests to disclose at this time.

Additional Questions:

- 1. **Are there other relationships or activities that readers could perceive to have influenced, or that give the appearance of potentially influencing, what you wrote in the submitted work?**  
No.
- 2. **What is the manuscript title?**  
Durability of Protection Against Future SARS-CoV-2 Infection Following Vaccination and Prior Infection in UK Healthcare Workers (the SIREN Cohort)
- 3. **Are you the corresponding author?**  
No.

Certification

I certify that the information provided in this disclosure is complete and accurate.



**Disclosure Purpose:** 21-18691

**Summary of Interests**

I do not have any interests to disclose at this time.

**Additional Questions:**

- 1. **Are there other relationships or activities that readers could perceive to have influenced, or that give the appearance of potentially influencing, what you wrote in the submitted work?**  
No.
- 2. **What is the manuscript title?**  
Effectiveness and durability of protection against future SARS-CoV-2 infection conferred by COVID-19 vaccination and previous infection; findings from the UK SIREN prospective cohort study of healthcare workers March 2020 to September 2021
- 3. **Are you the corresponding author?**  
No.

**Certification**

I certify that the information provided in this disclosure is complete and accurate.

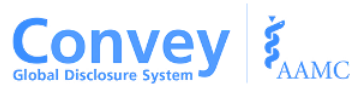

**Disclosure Purpose:** 21-18691

**Summary of Interests**

I do not have any interests to disclose at this time.

**Additional Questions:**

- 1. **Are there other relationships or activities that readers could perceive to have influenced, or that give the appearance of potentially influencing, what you wrote in the submitted work?**  
No.
- 2. **What is the manuscript title?**  
Durability of Protection Against Future SARS-CoV-2 Infection Following Vaccination and Prior Infection in UK Healthcare Workers (the SIREN Cohort)
- 3. **Are you the corresponding author?**  
No.

**Certification**

I certify that the information provided in this disclosure is complete and accurate.

**Disclosure Purpose:** 21-18691

Summary of Interests

I do not have any interests to disclose at this time.

Additional Questions:

- 1. **Are there other relationships or activities that readers could perceive to have influenced, or that give the appearance of potentially influencing, what you wrote in the submitted work?**  
No.
- 2. **What is the manuscript title?**  
Durability of Protection Against Future SARS-CoV-2 Infection Following Vaccination and Prior Infection in UK Healthcare Workers (the SIREN cohort)
- 3. **Are you the corresponding author?**  
No.

Certification

I certify that the information provided in this disclosure is complete and accurate.





**Disclosure Purpose:** 21-18691

**Summary of Interests**

I do not have any interests to disclose at this time.

**Additional Questions:**

- 1. **Are there other relationships or activities that readers could perceive to have influenced, or that give the appearance of potentially influencing, what you wrote in the submitted work?**  
No.
- 2. **What is the manuscript title?**  
Durability of Protection Against Future SARS-CoV-2 Infection Following Vaccination and Prior Infection in UK Healthcare Workers (the SIREN Cohort)
- 3. **Are you the corresponding author?**  
No.

**Certification**

I certify that the information provided in this disclosure is complete and accurate.

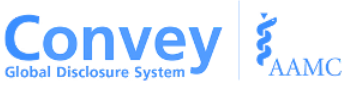

**Disclosure Purpose:** 21-18691

Summary of Interests

I do not have any interests to disclose at this time.

Additional Questions:

- 1. **Are there other relationships or activities that readers could perceive to have influenced, or that give the appearance of potentially influencing, what you wrote in the submitted work?**  
No.
- 2. **What is the manuscript title?**  
Durability of Protection Against Future SARS-CoV-2 Infection Following Vaccination and Prior Infection in UK Healthcare Workers (the SIREN Cohort)
- 3. **Are you the corresponding author?**  
No.

Certification

I certify that the information provided in this disclosure is complete and accurate.



**Disclosure Purpose:** 21-18691

### Summary of Interests

I do not have any interests to disclose at this time.

### Additional Questions:

- Are there other relationships or activities that readers could perceive to have influenced, or that give the appearance of potentially influencing, what you wrote in the submitted work?**  
No.
- What is the manuscript title?**  
Durability of Protection Against Future SARS-CoV-2 Infection Following Vaccination and Prior Infection in UK Healthcare Workers (the SIREN Cohort)
- Are you the corresponding author?**  
No.

### Certification

I certify that the information provided in this disclosure is complete and accurate.



**Disclosure Purpose:** 21-18691

**Summary of Interests**

I do not have any interests to disclose at this time.

**Additional Questions:**

- 1. **Are there other relationships or activities that readers could perceive to have influenced, or that give the appearance of potentially influencing, what you wrote in the submitted work?**  
No.
- 2. **What is the manuscript title?**  
Durability of Protection Against Future SARS-CoV-2 Infection Following Vaccination and Prior Infection in UK Healthcare Workers (the SIREN Cohort)
- 3. **Are you the corresponding author?**  
No.

**Certification**

I certify that the information provided in this disclosure is complete and accurate.



Disclosure Purpose: 21-18691

## Summary of Interests

### Company or Organization

| Entity                                                                                                                                                                 | Type             | Interest Held By                                                                                      |
|------------------------------------------------------------------------------------------------------------------------------------------------------------------------|------------------|-------------------------------------------------------------------------------------------------------|
| <a href="#">Medical Research Council</a>                                                                                                                               | Grant / Contract | Other - Research Grant for investigation of SARS-CoV-2 immunity and COVID-19 vaccine breakthroughs    |
| <i>Recipient Name:</i> SIREN Study<br><i>Grant / Contract Description:</i> Research Grant for investigation of SARS-CoV-2 immunity and COVID-19 vaccine breakthroughs  |                  | <i>Recipient Type:</i><br><i>Grant / Contract Purpose:</i> Research<br><i>Additional Information:</i> |
| <a href="#">National Institute for Health Research</a>                                                                                                                 | Grant / Contract | Other - SIREN study receives funding from NIHR                                                        |
| <i>Recipient Name:</i> SIREN Study<br><i>Grant / Contract Description:</i> SIREN study receives funding from NIHR<br><i>Additional Information:</i>                    |                  | <i>Recipient Type:</i><br><i>Grant / Contract Purpose:</i>                                            |
| <a href="#">UK Department of Health and Social Care</a>                                                                                                                | Grant / Contract | Other - The SIREN study is funded by DHSC (and governments in Scotland, Northern Ireland and Wales)   |
| <i>Recipient Name:</i> SIREN Study<br><i>Grant / Contract Description:</i> The SIREN study is funded by DHSC (and governments in Scotland, Northern Ireland and Wales) |                  | <i>Recipient Type:</i><br><i>Grant / Contract Purpose:</i> Research<br><i>Additional Information:</i> |

### Additional Questions:

- Are there other relationships or activities that readers could perceive to have influenced, or that give the appearance of potentially influencing, what you wrote in the submitted work?**

No.
- What is the manuscript title?**

Durability of Protection Against Future SARS-CoV-2 Infection Following Vaccination and Prior Infection in UK Healthcare Workers (the SIREN Cohort)
- Are you the corresponding author?**

No.

### Certification

I certify that the information provided in this disclosure is complete and accurate.

**Disclosure Purpose:** 21-18691

### Summary of Interests

I do not have any interests to disclose at this time.

### Additional Questions:

- Are there other relationships or activities that readers could perceive to have influenced, or that give the appearance of potentially influencing, what you wrote in the submitted work?**  
No.
- What is the manuscript title?**  
Durability of Protection Against Future SARS-CoV-2 Infection Following Vaccination and Prior Infection in UK Healthcare Workers (the SIREN Cohort)
- Are you the corresponding author?**  
No.

### Certification

I certify that the information provided in this disclosure is complete and accurate.

**Disclosure Purpose:** 21-18691

### Summary of Interests

I do not have any interests to disclose at this time.

### Additional Questions:

- Are there other relationships or activities that readers could perceive to have influenced, or that give the appearance of potentially influencing, what you wrote in the submitted work?**  
No.
- What is the manuscript title?**  
Durability of Protection Against Future SARS-CoV-2 Infection Following Vaccination and Prior Infection in UK Healthcare Workers (the SIREN Cohort)
- Are you the corresponding author?**  
No.

### Certification

I certify that the information provided in this disclosure is complete and accurate.

**Disclosure Purpose:** 21-18691

### Summary of Interests

I do not have any interests to disclose at this time.

### Additional Questions:

1. **Are there other relationships or activities that readers could perceive to have influenced, or that give the appearance of potentially influencing, what you wrote in the submitted work?**

No.

2. **What is the manuscript title?**

Duration of Protection of COVID-19 Vaccines Against Mild and Severe Disease

3. **Are you the corresponding author?**

Yes.

a. **Please list the other authors' names here.**

Victoria Hall Sarah Foulkes Ferdinando Insalata Peter Kirwan Ayoub Saei Peter Kirwan Ana Atti Edgar Wellington Jameel Khawam Katie Munro Michelle Cole Caio Tranquillini Andrew Taylor-Kerr Nipunadi Hettiarachchi Davina Calbraith Noshin Sajedi Iain Milligan Yrene Themistocleous Diane Corrigan Lisa Cromey Lesley Price Sally Stewart Elen de Lacy Chris Norman Ezra Linley Ashley David Otter Amanda Semper Jacqueline Hewson Silvia D'Arcangelo Meera Chand Colin S Brown Tim Brooks Jasmin Islam Andre Charlett Susan Hopkins

### Certification

I certify that the information provided in this disclosure is complete and accurate.

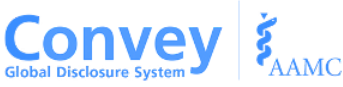



**Disclosure Purpose:** 21-18691

### Summary of Interests

I do not have any interests to disclose at this time.

### Additional Questions:

- Are there other relationships or activities that readers could perceive to have influenced, or that give the appearance of potentially influencing, what you wrote in the submitted work?**  
No.
- What is the manuscript title?**  
Effectiveness and durability of protection against future SARS-CoV-2 infection conferred by COVID-19 vaccination and previous infection; findings from the UK SIREN prospective cohort study of healthcare workers March 2020 to September 2021
- Are you the corresponding author?**  
No.

### Certification

I certify that the information provided in this disclosure is complete and accurate.

**Disclosure Purpose:** 21-18691

### Summary of Interests

I do not have any interests to disclose at this time.

### Additional Questions:

- Are there other relationships or activities that readers could perceive to have influenced, or that give the appearance of potentially influencing, what you wrote in the submitted work?**  
No.
- What is the manuscript title?**  
Durability of Protection Against Future SARS-CoV-2 Infection Following Vaccination and Prior Infection in UK Healthcare Workers (the SIREN Cohort)
- Are you the corresponding author?**  
No.

### Certification

I certify that the information provided in this disclosure is complete and accurate.

**Disclosure Purpose:** 21-18691

**Summary of Interests**

I do not have any interests to disclose at this time.

**Additional Questions:**

- 1. **Are there other relationships or activities that readers could perceive to have influenced, or that give the appearance of potentially influencing, what you wrote in the submitted work?**  
No.
- 2. **What is the manuscript title?**  
Durability of Protection Against Future SARS-CoV-2 Infection Following Vaccination and Prior Infection in UK Healthcare Workers (the SIREN Cohort)
- 3. **Are you the corresponding author?**  
No.

**Certification**

I certify that the information provided in this disclosure is complete and accurate.



**Disclosure Purpose:** 21-18691

Summary of Interests

I do not have any interests to disclose at this time.

Additional Questions:

- 1. **Are there other relationships or activities that readers could perceive to have influenced, or that give the appearance of potentially influencing, what you wrote in the submitted work?**  
No.
- 2. **What is the manuscript title?**  
Durability of Protection Against Future SARS-CoV-2 Infection Following Vaccination and Prior Infection in UK Healthcare Workers (the SIREN Cohort)
- 3. **Are you the corresponding author?**  
No.

Certification

I certify that the information provided in this disclosure is complete and accurate.



Disclosure Purpose: 21-18691

## Summary of Interests

## Company or Organization

| Entity                                                                                                                                                                          | Type             | Interest Held By                                                                                                                                                                |
|---------------------------------------------------------------------------------------------------------------------------------------------------------------------------------|------------------|---------------------------------------------------------------------------------------------------------------------------------------------------------------------------------|
| <a href="#">GlaxoSmithKline</a>                                                                                                                                                 | Grant / Contract | Self                                                                                                                                                                            |
| <i>Recipient Name:</i> Vaccine Evaluation Unit<br><i>Grant / Contract Description:</i> The Vaccine Evaluation Unit carries out contract research on behalf of UKHSA for GSK.    |                  | <i>Recipient Type:</i> Institution<br><i>Grant / Contract Purpose:</i> Research<br><i>Additional Information:</i> This is not directly related to the work in this publication. |
| <a href="#">Instituto Científico Pfizer</a>                                                                                                                                     | Grant / Contract | Self                                                                                                                                                                            |
| <i>Recipient Name:</i> Vaccine Evaluation Unit<br><i>Grant / Contract Description:</i> The Vaccine Evaluation Unit carries out contract research on behalf of UKHSA for Pfizer. |                  | <i>Recipient Type:</i> Institution<br><i>Grant / Contract Purpose:</i> Research<br><i>Additional Information:</i> This is not directly related to the work in this publication. |
| <a href="#">SANOFI PASTEUR INC.</a>                                                                                                                                             | Grant / Contract | Self                                                                                                                                                                            |
| <i>Recipient Name:</i> Vaccine Evaluation Unit<br><i>Grant / Contract Description:</i> The Vaccine Evaluation Unit carries out contract research on behalf of UKHSA for Sanofi. |                  | <i>Recipient Type:</i> Institution<br><i>Grant / Contract Purpose:</i> Research<br><i>Additional Information:</i> This is not directly related to the work in this publication. |

## Additional Questions:

- Are there other relationships or activities that readers could perceive to have influenced, or that give the appearance of potentially influencing, what you wrote in the submitted work?**  
No.
- What is the manuscript title?**  
Durability of Protection Against Future SARS-CoV-2 Infection Following Vaccination and Prior Infection in UK Healthcare Workers (the SIREN Cohort)
- Are you the corresponding author?**  
No.

## Certification

I certify that the information provided in this disclosure is complete and accurate.

**Disclosure Purpose:** 21-18691

Summary of Interests

I do not have any interests to disclose at this time.

Additional Questions:

- 1. **Are there other relationships or activities that readers could perceive to have influenced, or that give the appearance of potentially influencing, what you wrote in the submitted work?**  
No.
- 2. **What is the manuscript title?**  
Durability of Protection Against Future SARS-CoV-2 Infection Following Vaccination and Prior Infection in UK Healthcare Workers (the SIREN Cohort)
- 3. **Are you the corresponding author?**  
No.

Certification

I certify that the information provided in this disclosure is complete and accurate.



**Disclosure Purpose:** 21-18691

**Summary of Interests**

I do not have any interests to disclose at this time.

**Additional Questions:**

- 1. **Are there other relationships or activities that readers could perceive to have influenced, or that give the appearance of potentially influencing, what you wrote in the submitted work?**  
No.
- 2. **What is the manuscript title?**  
Durability of Protection Against Future SARS-CoV-2 Infection Following Vaccination and Prior Infection in UK Healthcare Workers (the SIREN Cohort)
- 3. **Are you the corresponding author?**  
No.

**Certification**

I certify that the information provided in this disclosure is complete and accurate.



**Disclosure Purpose:** 21-18691

Summary of Interests

I do not have any interests to disclose at this time.

Additional Questions:

- 1. **Are there other relationships or activities that readers could perceive to have influenced, or that give the appearance of potentially influencing, what you wrote in the submitted work?**  
No.
- 2. **What is the manuscript title?**  
Protection against SARS-CoV-2 after COVID-19 vaccination and prior infection
- 3. **Are you the corresponding author?**  
No.

Certification

I certify that the information provided in this disclosure is complete and accurate.





**Disclosure Purpose:** 21-18691

**Summary of Interests**

I do not have any interests to disclose at this time.

**Additional Questions:**

- 1. **Are there other relationships or activities that readers could perceive to have influenced, or that give the appearance of potentially influencing, what you wrote in the submitted work?**  
No.
- 2. **What is the manuscript title?**  
Durability of Protection Against Future SARS-CoV-2 Infection Following Vaccination and Prior Infection in UK Healthcare Workers (the SIREN Cohort)
- 3. **Are you the corresponding author?**  
No.

**Certification**

I certify that the information provided in this disclosure is complete and accurate.

**Disclosure Purpose:** 21-18691

**Summary of Interests**

I do not have any interests to disclose at this time.

**Additional Questions:**

- 1. **Are there other relationships or activities that readers could perceive to have influenced, or that give the appearance of potentially influencing, what you wrote in the submitted work?**  
No.
- 2. **What is the manuscript title?**  
Durability of Protection Against Future SARS-CoV-2 Infection Following Vaccination and Prior Infection in UK Healthcare Workers (the SIREN Cohort)
- 3. **Are you the corresponding author?**  
No.

**Certification**

I certify that the information provided in this disclosure is complete and accurate.



**Disclosure Purpose:** 21-18691

**Summary of Interests**

I do not have any interests to disclose at this time.

**Additional Questions:**

- Are there other relationships or activities that readers could perceive to have influenced, or that give the appearance of potentially influencing, what you wrote in the submitted work?**  
No.
- What is the manuscript title?**  
Durability of Protection Against Future SARS-CoV-2 Infection Following Vaccination and Prior Infection in UK Healthcare Workers (the SIREN Cohort)
- Are you the corresponding author?**  
No.

**Certification**

I certify that the information provided in this disclosure is complete and accurate.

**Disclosure Purpose:** 21-18691

### Summary of Interests

I do not have any interests to disclose at this time.

### Additional Questions:

- Are there other relationships or activities that readers could perceive to have influenced, or that give the appearance of potentially influencing, what you wrote in the submitted work?**  
No.
- What is the manuscript title?**  
Durability of Protection Against Future SARS-CoV-2 Infection Following Vaccination and Prior Infection in UK Healthcare Workers (the SIREN Cohort)
- Are you the corresponding author?**  
No.

### Certification

I certify that the information provided in this disclosure is complete and accurate.

**Disclosure Purpose:** 21-18691

Summary of Interests

I do not have any interests to disclose at this time.

Additional Questions:

- 1. **Are there other relationships or activities that readers could perceive to have influenced, or that give the appearance of potentially influencing, what you wrote in the submitted work?**  
No.
- 2. **What is the manuscript title?**  
Durability of Protection Against Future SARS-CoV-2 Infection Following Vaccination and Prior Infection in UK Healthcare Workers (the SIREN Cohort)
- 3. **Are you the corresponding author?**  
No.

Certification

I certify that the information provided in this disclosure is complete and accurate.



**Disclosure Purpose:** 21-18691

**Summary of Interests**

I do not have any interests to disclose at this time.

**Additional Questions:**

- 1. **Are there other relationships or activities that readers could perceive to have influenced, or that give the appearance of potentially influencing, what you wrote in the submitted work?**  
No.
- 2. **What is the manuscript title?**  
Durability of Protection Against Future SARS-CoV-2 Infection Following Vaccination and Prior Infection in UK Healthcare Workers (the SIREN Cohort)
- 3. **Are you the corresponding author?**  
No.

**Certification**

I certify that the information provided in this disclosure is complete and accurate.



**Disclosure Purpose:** 21-18691

### Summary of Interests

I do not have any interests to disclose at this time.

### Additional Questions:

- Are there other relationships or activities that readers could perceive to have influenced, or that give the appearance of potentially influencing, what you wrote in the submitted work?**  
No.
- What is the manuscript title?**  
Effectiveness and durability of protection against future SARS-CoV-2 infection conferred by COVID-19 vaccination and previous infection; findings from the UK SIREN prospective cohort study of healthcare workers March 2020 to September 2021
- Are you the corresponding author?**  
No.

### Certification

I certify that the information provided in this disclosure is complete and accurate.

**Disclosure Purpose:** 21-18691

### Summary of Interests

I do not have any interests to disclose at this time.

### Additional Questions:

- Are there other relationships or activities that readers could perceive to have influenced, or that give the appearance of potentially influencing, what you wrote in the submitted work?**  
No.
- What is the manuscript title?**  
Durability of Protection Against Future SARS-CoV-2 Infection Following Vaccination and Prior Infection in UK Healthcare Workers (the SIREN Cohort)
- Are you the corresponding author?**  
No.

### Certification

I certify that the information provided in this disclosure is complete and accurate.





**Disclosure Purpose:** 21-18691

**Summary of Interests**

I do not have any interests to disclose at this time.

**Additional Questions:**

- 1. **Are there other relationships or activities that readers could perceive to have influenced, or that give the appearance of potentially influencing, what you wrote in the submitted work?**  
No.
- 2. **What is the manuscript title?**  
Durability of Protection Against Future SARS-CoV-2 Infection Following Vaccination and Prior Infection in UK Healthcare Workers (the SIREN Cohort)
- 3. **Are you the corresponding author?**  
No.

**Certification**

I certify that the information provided in this disclosure is complete and accurate.



**Disclosure Purpose:** 21-18691

**Summary of Interests**

I do not have any interests to disclose at this time.

**Additional Questions:**

- 1. **Are there other relationships or activities that readers could perceive to have influenced, or that give the appearance of potentially influencing, what you wrote in the submitted work?**  
No.
- 2. **What is the manuscript title?**  
Durability of Protection Against Future SARS-CoV-2 Infection Following Vaccination and Prior Infection in UK Healthcare Workers (the SIREN Cohort)
- 3. **Are you the corresponding author?**  
No.

**Certification**

I certify that the information provided in this disclosure is complete and accurate.



Supplement: NEJMoa2118691_disclosures.pdf [file NEJMoa2118691_disclosures.pdf]
