# Supplementary material
Source: PubMed Central journal article supplement (PMC8908850)
Supplement: NEJMoa2118691_appendix.pdf [file NEJMoa2118691_appendix.pdf]

## Supplementary Appendix

Supplement to: Hall V, Foulkes S, Insalata F, et al. Protection against SARS-CoV-2 after Covid-19 vaccination and previous infection. *N Engl J Med*. DOI: 10.1056/NEJMoa2118691

This appendix has been provided by the authors to give readers additional information about the work.

## SUPPLEMENTARY APPENDIX

### Contents

|                                                                                                                                                                                                                                                    |    |
|----------------------------------------------------------------------------------------------------------------------------------------------------------------------------------------------------------------------------------------------------|----|
| Table S1: SIREN study group .....                                                                                                                                                                                                                  | 3  |
| Figure S1: SIREN participant flow diagram .....                                                                                                                                                                                                    | 11 |
| .....                                                                                                                                                                                                                                              | 11 |
| Table S2: Comparison of SIREN cohort with national population .....                                                                                                                                                                                | 12 |
| Figure S2: Description of cohort enrolment, vaccination coverage and SARS-CoV-2 variant dominance during analysis period, June 2020 to September 2021.....                                                                                         | 13 |
| Figure S3: Number of primary infections (A) and reinfections (B) in the SIREN cohort and national UK cases (C) by vaccine status and variant-dominant period, 07 December 2020 to 21 September 2021 .....                                          | 14 |
| Table S3: description of participant demographics, by cohort assignment and vaccine status at the end of the analysis period, June 2020 to September 2021 .....                                                                                    | 16 |
| Table S4: Incidence of SARS-CoV-2 reinfections and durability of protection against SARS-CoV-2 infection, adjusted for vaccine status, in the SIREN cohort between 07 December 2020 and 21 September 2021 – previously uninfected cohort only..... | 19 |
| Table S5: Incidence of SARS-CoV-2 reinfections and durability of protection against SARS-CoV-2 infection, adjusted for vaccine status, in the SIREN cohort between 07 December 2020 and 21 September 2021 – both cohorts .....                     | 20 |
| SUPPLEMENTARY SENSITIVITY ANALYSES .....                                                                                                                                                                                                           | 21 |
| Supplementary sensitivity analysis 1:.....                                                                                                                                                                                                         | 22 |
| Table S6. Output of sensitivity analysis assessing impact of delayed entry. Positive and Naïve cohort. ....                                                                                                                                        | 22 |
| Table S7. Output of sensitivity analysis assessing impact of delayed entry. Previously uninfected cohort. ....                                                                                                                                     | 23 |
| Supplementary sensitivity analysis 2.....                                                                                                                                                                                                          | 24 |
| Table S8. Output of sensitivity analysis assessing depletion-of- susceptibles bias. both cohorts.....                                                                                                                                              | 24 |
| Table S9. Output of sensitivity analysis assessing depletion-of- susceptibles bias. previously uninfected cohort .....                                                                                                                             | 25 |
| Supplementary sensitivity analysis 3.....                                                                                                                                                                                                          | 26 |

Table S10. Output of sensitivity analysis assessing impact of excluding positive cohort participants without a reliable date of primary infection, both cohorts. .... 26

Table S11. Output of sensitivity analysis assessing impact of excluding positive cohort participants without a reliable date of primary infection. Previously uninfected cohort. .... 27

**Table S1: SIREN study group**

| <b>No.</b> | <b>Institution</b>                                     | <b>First name</b> | <b>Surname</b>   |
|------------|--------------------------------------------------------|-------------------|------------------|
| 1.         | UK Health Security Agency                              | Ana               | Atti             |
| 2.         | UK Health Security Agency                              | Omoyeni           | Adebiyi          |
| 3.         | UK Health Security Agency                              | Nick              | Andrews          |
| 4.         | UK Health Security Agency                              | Tim               | Brooks           |
| 5.         | UK Health Security Agency                              | Colin             | Brown            |
| 6.         | UK Health Security Agency                              | Davina            | Calbraith        |
| 7.         | UK Health Security Agency                              | Meera             | Chand            |
| 8.         | UK Health Security Agency                              | Andre             | Charlett         |
| 9.         | UK Health Security Agency                              | Michelle          | Cole             |
| 10.        | UK Health Security Agency                              | Tom               | Coleman          |
| 11.        | UK Health Security Agency                              | Joanna            | Conneely         |
| 12.        | UK Health Security Agency                              | Paul              | Conneely         |
| 13.        | UK Health Security Agency                              | Eleanor           | Cross            |
| 14.        | UK Health Security Agency                              | Silvia            | D'Arcangelo      |
| 15.        | UK Health Security Agency                              | Sarah             | Foulkes          |
| 16.        | UK Health Security Agency                              | Nabila            | Fowles-Gutierrez |
| 17.        | UK Health Security Agency                              | Eileen            | Gallagher        |
| 18.        | UK Health Security Agency                              | Natalie           | Gillson          |
| 19.        | UK Health Security Agency                              | Victoria          | Hall             |
| 20.        | UK Health Security Agency                              | Nipu              | Hettiarachchi    |
| 21.        | UK Health Security Agency                              | Jacqueline        | Hewson           |
| 22.        | UK Health Security Agency                              | Bethany           | Hicks            |
| 23.        | UK Health Security Agency                              | Susan             | Hopkins          |
| 24.        | UK Health Security Agency                              | Kate              | Howell           |
| 25.        | UK Health Security Agency                              | Ferdinando        | Insalata         |
| 26.        | UK Health Security Agency                              | Jasmin            | Islam            |
| 27.        | UK Health Security Agency                              | Jameel            | Khawam           |
| 28.        | UK Health Security Agency                              | Robert            | Kyffin           |
| 29.        | UK Health Security Agency                              | Ezra              | Linley           |
| 30.        | UK Health Security Agency                              | Iain              | Milligan         |
| 31.        | UK Health Security Agency                              | Sebastian         | Milward          |
| 32.        | UK Health Security Agency                              | Edward            | Monk             |
| 33.        | UK Health Security Agency                              | Katie             | Munro            |
| 34.        | UK Health Security Agency                              | Claire            | Neill            |
| 35.        | UK Health Security Agency                              | Anne-Marie        | O'Connell        |
| 36.        | UK Health Security Agency                              | Ashley            | Otter            |
| 37.        | UK Health Security Agency                              | Mary              | Ramsay           |
| 38.        | UK Health Security Agency                              | Cathy             | Rowe             |
| 39.        | UK Health Security Agency                              | Ayoub             | Saei             |
| 40.        | UK Health Security Agency                              | Noshin            | Sajedi           |
| 41.        | UK Health Security Agency                              | Amanda            | Semper           |
| 42.        | UK Health Security Agency                              | Andrew            | Taylor-Kerr      |
| 43.        | UK Health Security Agency                              | Yrene             | Themistocleous   |
| 44.        | UK Health Security Agency                              | Jean              | Timeyin          |
| 45.        | UK Health Security Agency                              | Simon             | Tonge            |
| 46.        | UK Health Security Agency                              | Caio              | Tranquillini     |
| 47.        | UK Health Security Agency                              | Edgar             | Wellington       |
| 48.        | UK Health Security Agency                              | Maria             | Zambon           |
| 49.        | Public Health Agency Northern Ireland                  | Dianne            | Corrigan         |
| 50.        | Public Health Agency Northern Ireland                  | Lisa              | Cromey           |
| 51.        | Glasgow Caledonian University & Public Health Scotland | Lesley            | Price            |
| 52.        | Glasgow Caledonian University & Public Health Scotland | Sally             | Stewart          |

|            |                                                                 |                   |                |
|------------|-----------------------------------------------------------------|-------------------|----------------|
| 53.        | Glasgow Caledonian University & Public Health Scotland          | Nicola            | Sergenson      |
| 54.        | Public Health Scotland                                          | Jennifer          | Bishop         |
| 55.        | Public Health Scotland                                          | Jennifer          | Weir           |
| 56.        | Glasgow Caledonian University                                   | Ayo               | Matuluko       |
| 57.        | Glasgow Caledonian University                                   | Annelysse         | Jorgenson      |
| 58.        | Public Health Scotland                                          | Laura             | Dobbie         |
| 59.        | Public Health Scotland                                          | Andrew            | Telfer         |
| 60.        | Public Health Scotland                                          | David             | Goldberg       |
| 61.        | Public Health Wales                                             | Ellen             | De Lacy        |
| 62.        | Public Health Wales                                             | Guy               | Stevens        |
| 63.        | Public Health Wales                                             | Susannah          | Froude         |
| 64.        | Public Health Wales                                             | Linda             | Tyson          |
| 65.        | Health and Care Research Wales                                  | Yvette            | Ellis          |
| 66.        | Health and Care Research Wales                                  | Chris             | Norman         |
| <b>No.</b> | <b>Participating SIREN Sites</b>                                | <b>First name</b> | <b>Surname</b> |
| 1          | ALDER HEY CHILDREN'S NHS FOUNDATION TRUST                       | B                 | Larru          |
|            |                                                                 | S                 | Mcwilliam      |
| 2          | Aneurin Bevan University LHB                                    | John              | Northfield     |
|            |                                                                 | Sean              | Cutler         |
| 3          | ASHFORD AND ST PETER'S HOSPITALS NHS FOUNDATION TRUST           | Stephen           | Winchester     |
|            |                                                                 | Samuel            | Rowley         |
| 4          | BASILDON AND THURROCK UNIVERSITY HOSPITALS NHS FOUNDATION TRUST | Stacey            | Pepper         |
|            |                                                                 | Georgina          | Butt           |
| 5          | BEDFORDSHIRE HOSPITALS NHS FOUNDATION TRUST                     | Simantee          | Guha           |
|            |                                                                 | Philippa          | Bakker         |
| 6          | Belfast Health & Social Care Trust                              | Clodagh           | Loughrey       |
|            |                                                                 | A                 | Watt           |
| 7          | Betsi Cadwaladr University LHB                                  | Christian         | Subbe          |
|            |                                                                 | Alice             | Thomas         |
| 8          | BIRMINGHAM AND SOLIHULL MENTAL HEALTH NHS FOUNDATION TRUST      | Manny             | Bagary         |
|            |                                                                 | Di                | Baines         |
| 9          | BIRMINGHAM COMMUNITY HEALTHCARE NHS FOUNDATION TRUST            | Rebecca           | Chapman        |
|            |                                                                 | Lucy Booth        | Booth          |
| 10         | BLACK COUNTRY HEALTHCARE NHS FOUNDATION TRUST                   | Alison            | Grant          |
|            |                                                                 | Rebecca           | Temple-Purcell |
| 11         | BLACKPOOL TEACHING HOSPITALS NHS FOUNDATION TRUST               | Joanne            | Howard         |
|            |                                                                 | Emma              | Ward           |
| 12         | BOLTON NHS FOUNDATION TRUST                                     | Chinari           | Subudhi        |
| 13         | BRIGHTON AND SUSSEX UNIVERSITY HOSPITALS NHS TRUST              | Marion            | Campbell       |
|            |                                                                 | Andrew            | Bexley         |
| 14         | BUCKINGHAMSHIRE HEALTHCARE NHS TRUST                            | R                 | Penn           |
|            |                                                                 | N                 | Wong           |
| 15         | CALDERDALE AND HUDDERSFIELD NHS FOUNDATION TRUST                | G                 | Boyd           |
|            |                                                                 | A                 | Rajgopal       |
| 16         | CENTRAL AND NORTH WEST LONDON NHS FOUNDATION TRUST              | Abigail           | Severn         |
|            |                                                                 | R                 | Matthews       |

|    |                                                                 |              |             |
|----|-----------------------------------------------------------------|--------------|-------------|
| 17 | CHESTERFIELD ROYAL HOSPITAL NHS FOUNDATION TRUST                | Edward       | Harris      |
|    |                                                                 | Amanda       | Whileman    |
| 18 | CORNWALL PARTNERSHIP NHS FOUNDATION TRUST                       | Richard      | Laugharne   |
|    |                                                                 | Joanna       | Ledger      |
| 19 | COUNTESS OF CHESTER HOSPITAL NHS FOUNDATION TRUST               | T            | Barnes      |
|    |                                                                 | C            | Jones       |
| 20 | CROYDON HEALTH SERVICES NHS TRUST                               | Banerjee     | SubhroOsuji |
|    |                                                                 | Anna         | Rokakis     |
| 21 | Cwm Taf Morgannwg University LHB                                | John         | Geen        |
|    |                                                                 | Carla        | Pothecary   |
| 22 | DARTFORD AND GRAVESHAM NHS TRUST                                | Tracy        | Edmunds     |
|    |                                                                 | Nihil        | Chitalia    |
| 23 | DERBYSHIRE COMMUNITY HEALTH SERVICES NHS FOUNDATION TRUST       | Sarah        | Creer       |
|    |                                                                 | Eve          | Etell Kirby |
| 24 | DERBYSHIRE HEALTHCARE NHS FOUNDATION TRUST                      | S            | Akhtar      |
|    |                                                                 | G            | Harrison    |
| 25 | DEVON PARTNERSHIP NHS TRUST                                     | Clare        | McAdam      |
|    |                                                                 | Natalie      | Crooks      |
| 26 | DONCASTER AND BASSETLAW TEACHING HOSPITALS NHS FOUNDATION TRUST | K            | Agwuh       |
|    |                                                                 | V            | Maxwell     |
| 27 | DORSET COUNTY HOSPITAL NHS FOUNDATION TRUST                     | Jennifer     | Graves      |
| 28 | DORSET HEALTHCARE UNIVERSITY NHS FOUNDATION TRUST               | James        | Colton      |
| 29 | EAST SUFFOLK AND NORTH ESSEX NHS FOUNDATION TRUST               | A            | O'Kelly     |
|    |                                                                 | P            | Ridley      |
| 30 | EAST SUSSEX HEALTHCARE NHS TRUST                                | Anna         | Cowley      |
|    |                                                                 | Janet        | Sinclair    |
| 31 | EPSOM AND ST HELIER UNIVERSITY HOSPITALS NHS TRUST              | Helen        | Johnstone   |
|    |                                                                 | Neringa      | Vilimiene   |
| 32 | FRIMLEY HEALTH NHS FOUNDATION TRUST                             | Manjula      | Meda        |
|    |                                                                 | Jane         | Democratis  |
| 33 | GEORGE ELIOT HOSPITAL NHS TRUST                                 | Simon        | Brake       |
|    |                                                                 | David        | Boss        |
| 34 | GLOUCESTERSHIRE HOSPITALS NHS FOUNDATION TRUST                  | Amanda       | Selassie    |
|    |                                                                 | Rekha Prince | Plackal     |
| 35 | Golden Jubilee National Hospital                                | Catherine    | Sinclair    |
|    |                                                                 | Val          | Irvine      |
| 36 | GREAT WESTERN HOSPITALS NHS FOUNDATION TRUST                    | Eva          | Fraile      |
| 37 | HAMPSHIRE HOSPITALS NHS FOUNDATION TRUST                        | Claire       | Thomas      |
|    |                                                                 | Ina          | Hoad        |
| 38 | HOUNSLOW AND RICHMOND COMMUNITY HEALTHCARE NHS TRUST            | Shekoo       | Mackay      |
|    |                                                                 | Shivani      | Khan        |
| 39 | HULL UNIVERSITY TEACHING HOSPITALS NHS TRUST                    | Philippa     | Burns       |
|    |                                                                 | Nicholas     | Easom       |

|    |                                                       |            |               |
|----|-------------------------------------------------------|------------|---------------|
| 40 | Hywel Dda University LHB                              | Tracy      | Lewis         |
|    |                                                       | Zohra      | Omar          |
| 41 | IMPERIAL COLLEGE HEALTHCARE NHS TRUST                 | Graham     | Pickard       |
|    |                                                       | Kenisha    | Lewis         |
| 42 | ISLE OF WIGHT NHS TRUST                               | Sarah      | Hinch         |
|    |                                                       | Alison     | Brown         |
| 43 | JAMES PAGET UNIVERSITY HOSPITALS NHS FOUNDATION TRUST | Ben        | Burton        |
|    |                                                       | Christian  | Hacon         |
| 44 | KING'S COLLEGE HOSPITAL NHS FOUNDATION TRUST          | Ray        | Chaudhuri     |
|    |                                                       | Jonnie     | Aeron-Thomas  |
| 45 | LANCASHIRE & SOUTH CUMBRIA NHS FOUNDATION TRUST       | Robert     | Shorten       |
|    |                                                       | Kathryn    | Williams      |
| 46 | LANCASHIRE TEACHING HOSPITALS NHS FOUNDATION TRUST    | Maya       | Leach         |
|    |                                                       | Robert     | Shorten       |
| 47 | LEEDS TEACHING HOSPITALS NHS TRUST                    | Kyra       | Holliday      |
|    |                                                       | Clair      | Favager       |
| 48 | LEICESTERSHIRE PARTNERSHIP NHS TRUST                  | Sarah      | Baillon       |
|    |                                                       | Samantha   | Hamer         |
| 49 | LEWISHAM AND GREENWICH NHS TRUST                      | A          | Shah          |
|    |                                                       | J          | Russell       |
| 50 | LINCOLNSHIRE PARTNERSHIP NHS FOUNDATION TRUST         | Kelly      | Moran         |
|    |                                                       | Ananta     | Dave          |
| 51 | LIVERPOOL UNIVERSITY HOSPITALS NHS FOUNDATION TRUST   | Anu        | Chawla        |
|    |                                                       | Fran       | Westwell      |
| 52 | LONDON NORTH WEST UNIVERSITY HEALTHCARE NHS TRUST     | Ekaterina  | Watson        |
|    |                                                       | D          | Adeboyeku     |
| 53 | MAIDSTONE AND TUNBRIDGE WELLS NHS TRUST               | C          | Pegg          |
|    |                                                       | M          | Williams      |
| 54 | MANCHESTER UNIVERSITY NHS FOUNDATION TRUST            | S          | Ahmad         |
|    |                                                       | A          | Horsley       |
| 55 | MID CHESHIRE HOSPITALS NHS FOUNDATION TRUST           | Claire     | Gabriel       |
|    |                                                       | Katherin   | Pagett        |
| 56 | MID ESSEX HOSPITAL SERVICES NHS TRUST                 | Lauren     | Sach          |
|    |                                                       | Yvonne     | Lester        |
| 57 | MID YORKSHIRE HOSPITALS NHS TRUST                     | Ismaelette | Del Rosario   |
|    |                                                       | John       | Ashcroft      |
| 58 | MOORFIELDS EYE HOSPITAL NHS FOUNDATION TRUST          | Roxanne    | Crosby-Nwaobi |
|    |                                                       | Chloe      | Reeks         |
| 59 | NHS Borders                                           | Joy        | Dawson        |
|    |                                                       | Lauren     | Finlayson     |
| 60 | NHS Fife                                              | Susan      | Fowler        |
|    |                                                       | Devesh     | Dhasmana      |
| 61 | NHS Forth Valley                                      | Euan       | Cameron       |
|    |                                                       | Anne       | Todd          |
| 62 | NHS Grampian                                          | Harriet    | Carroll       |
|    |                                                       | Alison     | Thornton      |

|    |                                                               |           |               |
|----|---------------------------------------------------------------|-----------|---------------|
| 63 | NHS Greater Glasgow and Clyde                                 | Antonia   | Ho            |
|    |                                                               | Michael   | Murphy        |
| 64 | NHS Highland                                                  | Andrew    | Gibson        |
|    |                                                               | Alexandra | Cochrane      |
| 65 | NHS Lanarkshire                                               | Manish    | Patel         |
|    |                                                               | Karen     | Black         |
| 66 | NHS Lothian                                                   | Kate      | Templeton     |
|    |                                                               | Andrea    | Clarke        |
| 67 | NHS Western Isles                                             | Martin    | Malcolm       |
|    |                                                               | Joan      | Frieslick     |
| 68 | NORFOLK AND NORWICH UNIVERSITY HOSPITALS NHS FOUNDATION TRUST | Ngozi     | Elumogo       |
|    |                                                               | Louise    | Coke          |
| 69 | NORTH CUMBRIA INTEGRATED CARE NHS FOUNDATION TRUST            | Beverly   | Wilkinson     |
|    |                                                               | John      | Elliott       |
| 70 | NORTH MIDDLESEX UNIVERSITY HOSPITAL NHS TRUST                 | Mariyam   | Mirfenderesky |
|    |                                                               | Pratap    | Harbham       |
| 71 | NORTH WEST ANGLIA NHS FOUNDATION TRUST                        | Janki     | Bhayani       |
|    |                                                               | Stephanie | Diaz          |
| 72 | NORTHERN DEVON HEALTHCARE NHS TRUST                           | M         | Howard        |
|    |                                                               | T         | Lewis         |
| 73 | NORTHERN HEALTH AND SOCIAL CARE TRUST                         | Elinor    | Hanna         |
|    |                                                               | Frances   | Johnston      |
| 74 | NORTHERN LINCOLNSHIRE AND GOOLE NHS FOUNDATION TRUST          | Jonathan  | Hatton        |
|    |                                                               | Peter     | Cowling       |
| 75 | NOTTINGHAM UNIVERSITY HOSPITALS NHS TRUST                     | Sarah     | Brand         |
|    |                                                               | Imogen    | Gould         |
| 76 | POOLE HOSPITAL NHS FOUNDATION TRUST                           | Beverley  | Wadams        |
|    |                                                               | Elizabeth | Sheridan      |
| 77 | PORTSMOUTH HOSPITALS NHS TRUST                                | Johanna   | Mouland       |
|    |                                                               | Jade      | Yates         |
| 78 | Powys Teaching LHB                                            | Jayne     | Goodwin       |
|    |                                                               | Chris     | Norman        |
| 79 | QUEEN VICTORIA HOSPITAL NHS FOUNDATION TRUST                  | J         | Giles         |
|    |                                                               | G         | Pottinger     |
| 80 | ROYAL BERKSHIRE NHS FOUNDATION TRUST                          | Maya      | Joseph        |
|    |                                                               | Holly     | Coles         |
| 81 | ROYAL CORNWALL HOSPITALS NHS TRUST                            | H         | Chenoweth     |
|    |                                                               | D         | Browne        |
| 82 | ROYAL DEVON AND EXETER NHS FOUNDATION TRUST                   | Cressida  | Auckland      |
|    |                                                               | Stephanie | Prince        |
| 83 | ROYAL FREE LONDON NHS FOUNDATION TRUST                        | Alison    | Rodger        |
|    |                                                               | Tabitha   | Mahungu       |
| 84 | ROYAL NATIONAL ORTHOPAEDIC HOSPITAL NHS TRUST                 | Esther    | Hanison       |
|    |                                                               | Simon     | Warren        |
| 85 |                                                               | Sumita    | Pai           |



|     |                                                       |                          |                  |
|-----|-------------------------------------------------------|--------------------------|------------------|
|     | ROYAL PAPWORTH HOSPITAL NHS FOUNDATION TRUST          | Helen                    | Baxendale        |
| 86  | ROYAL SURREY COUNTY HOSPITAL NHS FOUNDATION TRUST     | Charles                  | Piercy           |
|     |                                                       | Esther                   | Tarr             |
| 87  | ROYAL UNITED HOSPITALS BATH NHS FOUNDATION TRUST      | Debbie                   | Delgado          |
|     |                                                       | Sarah                    | Meisner          |
| 88  | SALISBURY NHS FOUNDATION TRUST                        | Catherine                | Thompson         |
|     |                                                       | Sophia                   | Strong-Sheldrake |
| 89  | SANDWELL AND WEST BIRMINGHAM HOSPITALS NHS TRUST      | Ash                      | Turner           |
|     |                                                       | Anne                     | Hayes            |
| 90  | SHEFFIELD CHILDREN'S NHS FOUNDATION TRUST             | S                        | Gormley          |
|     |                                                       | C                        | Kerrison         |
| 91  | SHEFFIELD TEACHING HOSPITALS NHS FOUNDATION TRUST     | Thushan                  | de Silva         |
|     |                                                       | Simon                    | Tazzyman         |
| 92  | SHERWOOD FOREST HOSPITALS NHS FOUNDATION TRUST        | Lynne                    | Allsop           |
|     |                                                       | Shrikant                 | Ambalkar         |
| 93  | SHREWSBURY AND TELFORD HOSPITAL NHS TRUST             | Mandy                    | Beekes           |
|     |                                                       | Hannah                   | Gibson           |
| 94  | SHROPSHIRE COMMUNITY HEALTH NHS TRUST                 | Johanne                  | Tomlinson        |
| 95  | SOLENT NHS TRUST                                      | Cathy                    | Price            |
|     |                                                       | The Solent Research Team |                  |
| 96  | SOMERSET NHS FOUNDATION TRUST                         | Justin                   | Pepperell        |
|     |                                                       | Kate                     | James            |
| 97  | South Eastern Health & Social Care                    | Yuri                     | Protaschik       |
|     | South Eastern Health & Social Care                    | Tom                      | Trinick          |
| 98  | SOUTHEND UNIVERSITY HOSPITAL NHS FOUNDATION TRUST     | John                     | Day              |
|     |                                                       | Swapna                   | Kunhunny         |
| 99  | Southern Health & Social Care Trust                   | Angel                    | Boulos           |
|     |                                                       | Alice                    | Neave            |
| 100 | SOUTHERN HEALTH NHS FOUNDATION TRUST                  | Qi                       | Zheng            |
| 101 | SOUTHPORT AND ORMSKIRK HOSPITAL NHS TRUST             | Katherine                | Gray             |
|     |                                                       | Kerryanne                | Brown            |
| 102 | ST GEORGE'S UNIVERSITY HOSPITALS NHS FOUNDATION TRUST | Tim                      | Planche          |
|     |                                                       | Angela                   | Houston          |
| 103 | ST HELENS AND KNOWSLEY TEACHING HOSPITALS NHS TRUST   | Rowan                    | Pritchard Jones  |
|     |                                                       | Diane                    | Wycherley        |
| 104 | STOCKPORT NHS FOUNDATION TRUST                        | Barzo                    | Faris            |
| 105 | SURREY AND SUSSEX HEALTHCARE NHS TRUST                | K                        | Nimako           |
|     |                                                       | B                        | Stewart          |
| 106 | Swansea Bay University LHB                            | Claire                   | Stafford         |
|     |                                                       | Rebeccah                 | Thomas           |
| 107 |                                                       | Sheena                   | Khanduri         |

|     |                                                                           |             |                    |
|-----|---------------------------------------------------------------------------|-------------|--------------------|
|     | THE CLATTERBRIDGE CANCER CENTRE NHS FOUNDATION TRUST                      | Nagesh      | Kalakonda          |
| 108 | THE DUDLEY GROUP NHS FOUNDATION TRUST                                     | Helen       | Ashby              |
| 109 | THE HILLINGDON HOSPITALS NHS FOUNDATION TRUST                             | Natasha     | Mahabir            |
| 110 | THE NEWCASTLE UPON TYNE HOSPITALS NHS FOUNDATION TRUST                    | J           | Harwood            |
|     |                                                                           | B           | Payne              |
| 111 | THE PRINCESS ALEXANDRA HOSPITAL NHS TRUST                                 | Kathryn     | Court              |
|     |                                                                           | Nikki       | White              |
| 112 | THE ROBERT JONES AND AGNES HUNT ORTHOPAEDIC HOSPITAL NHS FOUNDATION TRUST | Ruth        | Longfellow         |
| 113 | THE ROYAL BOURNEMOUTH AND CHRISTCHURCH HOSPITALS NHS FOUNDATION TRUST     | Mihye       | Lee                |
| 114 | THE ROYAL WOLVERHAMPTON NHS TRUST                                         | Marie       | Green              |
|     |                                                                           | Lauren      | Hughes             |
| 115 | TORBAY AND SOUTH DEVON NHS FOUNDATION TRUST                               | Mathew      | Halkes             |
|     |                                                                           | Pauline     | Mercer             |
| 116 | UNITED LINCOLNSHIRE HOSPITALS NHS TRUST                                   | Alun        | Roebuck            |
|     |                                                                           |             | ULHT Research Team |
| 117 | UNIVERSITY HOSPITAL SOUTHAMPTON NHS FOUNDATION TRUST                      | E           | Wilson-Davies      |
| 118 | UNIVERSITY HOSPITALS BRISTOL AND WESTON NHS FOUNDATION TRUST              | Rajeka      | Lazarus            |
|     |                                                                           | Aaran       | Sinclair           |
| 119 | UNIVERSITY HOSPITALS COVENTRY AND WARWICKSHIRE NHS TRUST                  | N           | Aldridge           |
|     |                                                                           | L           | Berry              |
| 120 | UNIVERSITY HOSPITALS OF DERBY AND BURTON NHS FOUNDATION TRUST             | F           | Game               |
|     |                                                                           | T           | Reynolds           |
| 121 | UNIVERSITY HOSPITALS OF LEICESTER NHS TRUST                               | Christopher | Holmes             |
|     |                                                                           | Martin      | Wiselka            |
| 122 | UNIVERSITY HOSPITALS OF MORECAMBE BAY NHS FOUNDATION TRUST                | Lynda       | Fothergill         |
|     |                                                                           | Karen       | Burns              |
| 123 | UNIVERSITY HOSPITALS OF NORTH MIDLANDS NHS TRUST                          | Christopher | Duff               |
|     |                                                                           | Martin      | Booth              |
| 124 | UNIVERSITY HOSPITALS PLYMOUTH NHS TRUST                                   | Hannah      | Jory               |
|     |                                                                           | David       | Hilton             |
| 125 | Velindre NHS Trust                                                        | Charlotte   | Young              |
|     |                                                                           | James       | Powell             |
| 126 | WALSALL HEALTHCARE NHS TRUST                                              | Lisa        | Richardson         |
|     |                                                                           | Aiden       | Plant              |
| 127 | WARRINGTON AND HALTON TEACHING HOSPITALS NHS FOUNDATION TRUST             | Zaman       | Qazzafi            |
|     |                                                                           | Lisa        | Ditchfield         |
| 128 | WEST SUFFOLK NHS FOUNDATION TRUST                                         | A           | Moody              |
|     |                                                                           | R           | Tilley             |

|            |                                                                        |                   |                   |
|------------|------------------------------------------------------------------------|-------------------|-------------------|
| 129        | Western Health & Social Care Trust                                     | Tracy             | Donaghy           |
|            |                                                                        | Maurice           | O'Kane            |
| 130        | WESTERN SUSSEX HOSPITALS NHS FOUNDATION TRUST                          | R                 | Sierra            |
|            |                                                                        | K                 | Shipman           |
| 131        | WHITTINGTON HEALTH NHS TRUST                                           | Philippa          | Kemsley           |
|            |                                                                        | Chetan            | Parmar            |
| 132        | WIRRAL UNIVERSITY TEACHING HOSPITAL NHS FOUNDATION TRUST               | D                 | Harvey            |
|            |                                                                        | Y                 | Huang             |
| 133        | WYE VALLEY NHS TRUST                                                   | L                 | Robinson          |
| 134        | YEOVIL DISTRICT HOSPITAL NHS FOUNDATION TRUST                          | Sarah             | Board             |
|            |                                                                        | Andrew            | Broadley          |
| 135        | YORK TEACHING HOSPITAL NHS FOUNDATION TRUST                            | Claire            | Brookes           |
|            |                                                                        | Mags              | Szewczyk          |
| <b>No.</b> | <b>SIREN Associated Studies</b>                                        | <b>First name</b> | <b>Surname</b>    |
| 1.         | Protective Immunity from T cells to Covid-19 in Health workers (PITCH) | Susie             | Dunachie          |
| 2.         | Protective Immunity from T cells to Covid-19 in Health workers (PITCH) | Paul              | Klenerman         |
| 3.         | Protective Immunity from T cells to Covid-19 in Health workers (PITCH) | Chris             | Duncan            |
| 4.         | Protective Immunity from T cells to Covid-19 in Health workers (PITCH) | Lance             | Turtle            |
| 5.         | Protective Immunity from T cells to Covid-19 in Health workers (PITCH) | Alex              | Richter           |
| 6.         | Protective Immunity from T cells to Covid-19 in Health workers (PITCH) | Thushan           | De Silva          |
| 7.         | Protective Immunity from T cells to Covid-19 in Health workers (PITCH) | Eleanor           | Barnes            |
| 8.         | Protective Immunity from T cells to Covid-19 in Health workers (PITCH) | Daniel            | Wootton           |
| 9.         | The Humoral Immune Correlates for COVID-19 (HICC) consortium           | Jonathan          | Heeney            |
| 10.        | The Humoral Immune Correlates for COVID-19 (HICC) consortium           | Helen             | Baxendale         |
| 11.        | The Humoral Immune Correlates for COVID-19 (HICC) consortium           | Javier            | Castillo-Olivares |
| 12.        | The Francis Crick Institute                                            | Rupert            | Beale             |
| 13.        | The Francis Crick Institute                                            | Edward            | Carr              |
| 14.        | Genotype2Phenotype (G2P)                                               | Wendy             | Barclay           |
| 15.        | Genotype2Phenotype (G2P)                                               | Massimo           | Palmarini         |
| 16.        | GenOMICC                                                               | John<br>Kenneth   | Baillie           |

**Figure S1: SIREN participant flow diagram**

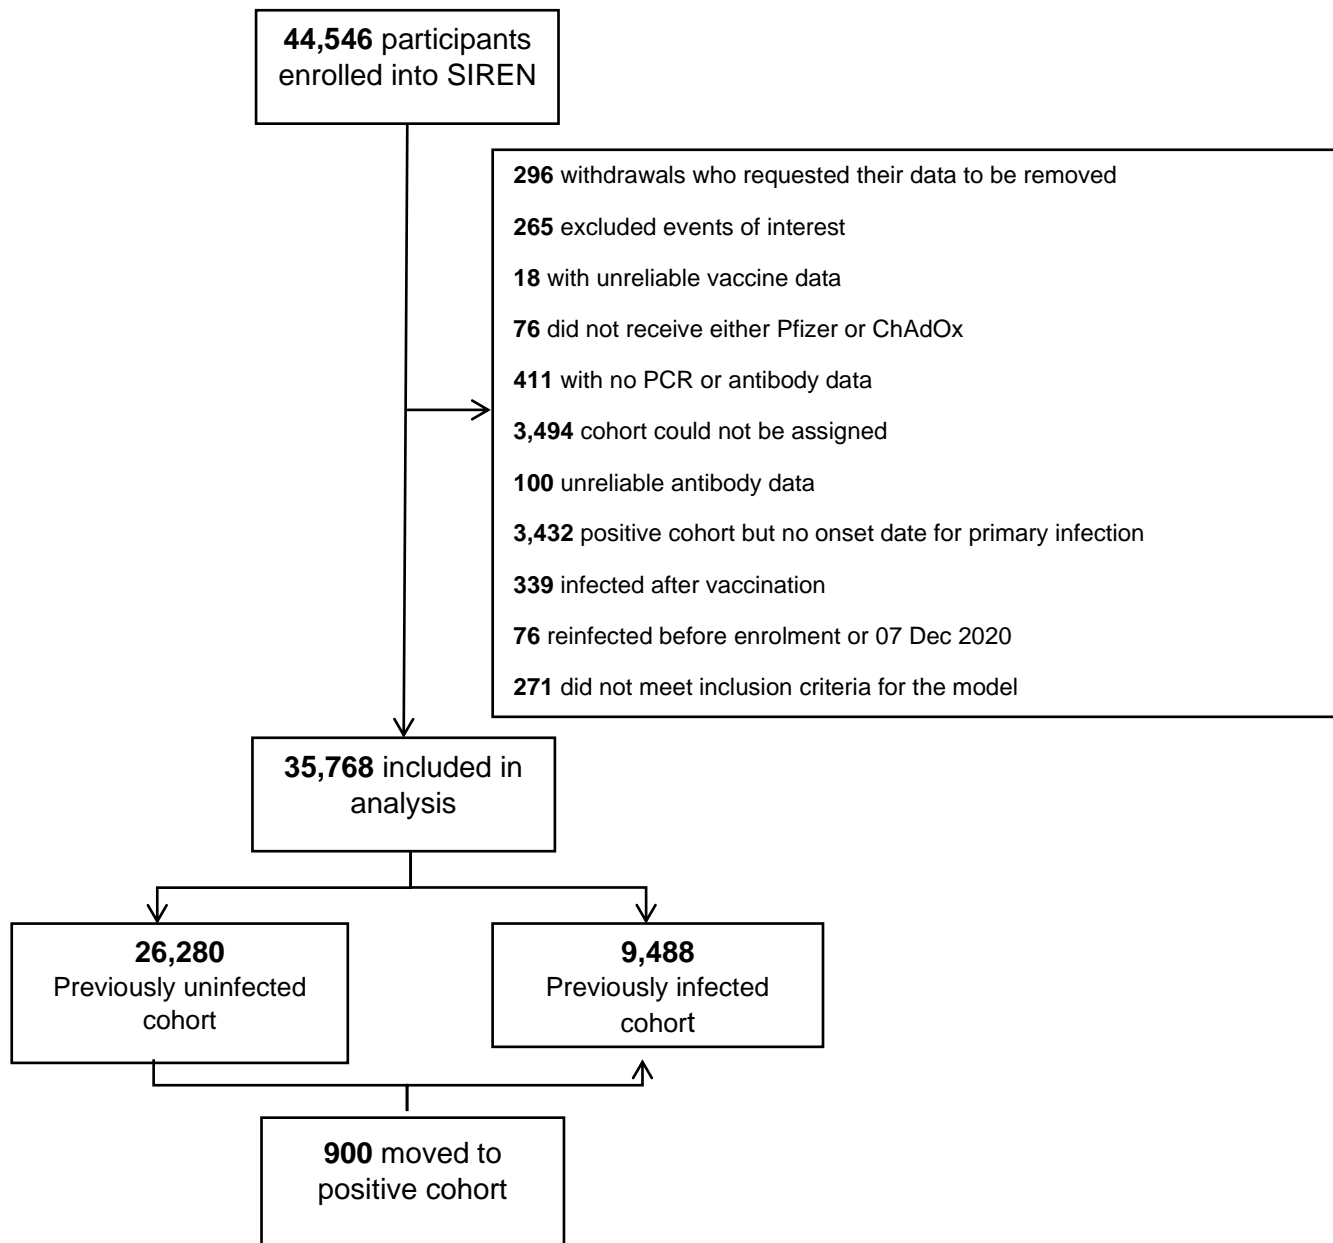

\*Events of interest excluded after initial screening include misreported results, false positive results, seroconversion between two RT-PCR positive results less than 90 days apart and seroconversion after vaccination confirmed by anti-N SARS-CoV-2 negativity.

**Table S2: Comparison of SIREN cohort with national population**

| Demographics                             | SIREN cohort n (%) | UK Population n (%) | Comment on generalisability                                                                                                                                               |
|------------------------------------------|--------------------|---------------------|---------------------------------------------------------------------------------------------------------------------------------------------------------------------------|
| <b>Gender</b>                            |                    |                     |                                                                                                                                                                           |
| Male                                     | 5,699 (15.9)       | 33,145,709 (49.4)   | The healthcare workforce is predominately female, as reflected in SIREN recruitment                                                                                       |
| Female                                   | 30,017 (83.9)      | 33,935,525 (50.6)   |                                                                                                                                                                           |
| Other                                    | 52 (0.1)           | N/A                 |                                                                                                                                                                           |
| <b>Age group</b>                         |                    |                     |                                                                                                                                                                           |
| Under 25                                 | 1297 (3.6)         | 19,791,695 (29.5)   | The SIREN cohort is relatively young, and therefore less suited for analysis of severe outcomes of COVID-19 which disproportionately affect individuals over 65 years old |
| 25 to 34                                 | 7,106 (19.9)       | 8,998,605 (13.4)    |                                                                                                                                                                           |
| 35 to 44                                 | 8,848 (24.7)       | 8,495,643 (12.7)    |                                                                                                                                                                           |
| 45 to 54                                 | 10,874 (30.4)      | 8,919,984 (13.3)    |                                                                                                                                                                           |
| 55 to 64                                 | 7,085 (19.8)       | 8,366,669 (12.5)    |                                                                                                                                                                           |
| Over 65                                  | 558 (1.6)          | 12,508,638 (18.6)   |                                                                                                                                                                           |
| <b>Ethnicity*</b>                        |                    |                     |                                                                                                                                                                           |
| White                                    | 31,634 (88.4)      | 50,408,100 (84.8)   | Participants from black ethnic groups are underrepresented in the SIREN cohort                                                                                            |
| Asian                                    | 2,486 (7.0)        | 4,737,800 (8.0)     |                                                                                                                                                                           |
| Black                                    | 621 (1.7)          | 2,095,900 (3.5)     |                                                                                                                                                                           |
| Mixed race                               | 535 (1.5)          | 1,082,500 (1.8)     |                                                                                                                                                                           |
| Other ethnic group                       | 427 (1.2)          | 1,115,400 (1.9)     |                                                                                                                                                                           |
| Prefer not to say                        | 65 (0.2)           | N/A                 |                                                                                                                                                                           |
| <b>Geographical area</b>                 |                    |                     |                                                                                                                                                                           |
| East Midlands                            | 2825 (7.9)         | 4,865,583 (7.3)     | All four UK nations and English regions are represented in the SIREN cohort, with Scotland overrepresented and Wales underrepresented                                     |
| East of England                          | 3363 (9.4)         | 6,269,161 (9.3)     |                                                                                                                                                                           |
| London                                   | 3688 (10.3)        | 9,002,488 (13.4)    |                                                                                                                                                                           |
| North East                               | 647 (1.8)          | 2,680,763 (4.0)     |                                                                                                                                                                           |
| North West                               | 3429 (9.6)         | 7,367,456 (11.0)    |                                                                                                                                                                           |
| South East                               | 3548 (9.9)         | 9,217,265 (13.7)    |                                                                                                                                                                           |
| South West                               | 5540 (15.5)        | 5,659,143 (8.4)     |                                                                                                                                                                           |
| West Midlands                            | 2717 (7.6)         | 5,961,929 (8.9)     |                                                                                                                                                                           |
| Yorkshire and Humber                     | 2644 (7.4)         | 5,526,350 (8.2)     |                                                                                                                                                                           |
| Scotland                                 | 5449 (15.2)        | 5,466,000 (8.1)     |                                                                                                                                                                           |
| Northern Ireland                         | 1127 (3.2)         | 1,895,510 (2.8)     |                                                                                                                                                                           |
| Wales                                    | 791 (2.2)          | 3,169,586 (4.7)     |                                                                                                                                                                           |
| <b>Vaccination status by 21 Sep 2021</b> |                    |                     |                                                                                                                                                                           |
| 2-doses                                  | 33,940 (94.9)      | 44,560,000 (65)     | The SIREN cohort is highly vaccinated relative to the general UK population                                                                                               |
| 1-dose                                   | 937 (2.6)          | 4,060,000 (6.0)     |                                                                                                                                                                           |
| <b>Total</b>                             | <b>35,768</b>      | <b>67,081,234</b>   |                                                                                                                                                                           |

**Figure S2: Description of cohort enrolment, vaccination coverage and SARS-CoV-2 variant dominance during analysis period, June 2020 to September 2021**

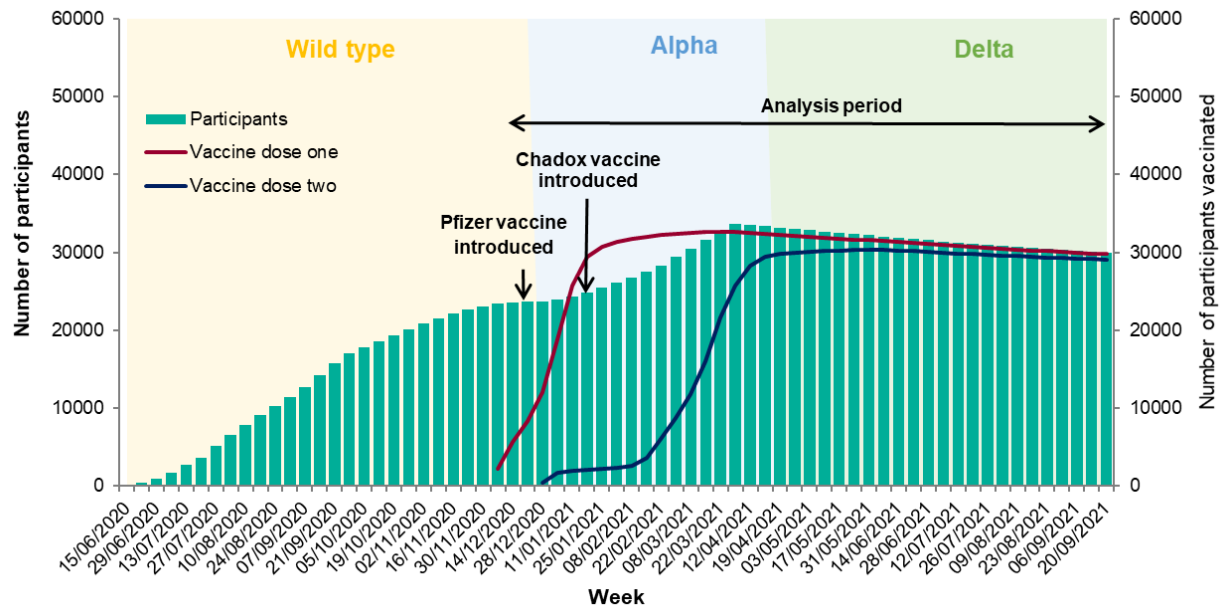

**Figure S3: Number of primary infections (A) and reinfections (B) in the SIREN cohort and national UK cases (C) by vaccine status and variant-dominant period, 07 December 2020 to 21 September 2021**

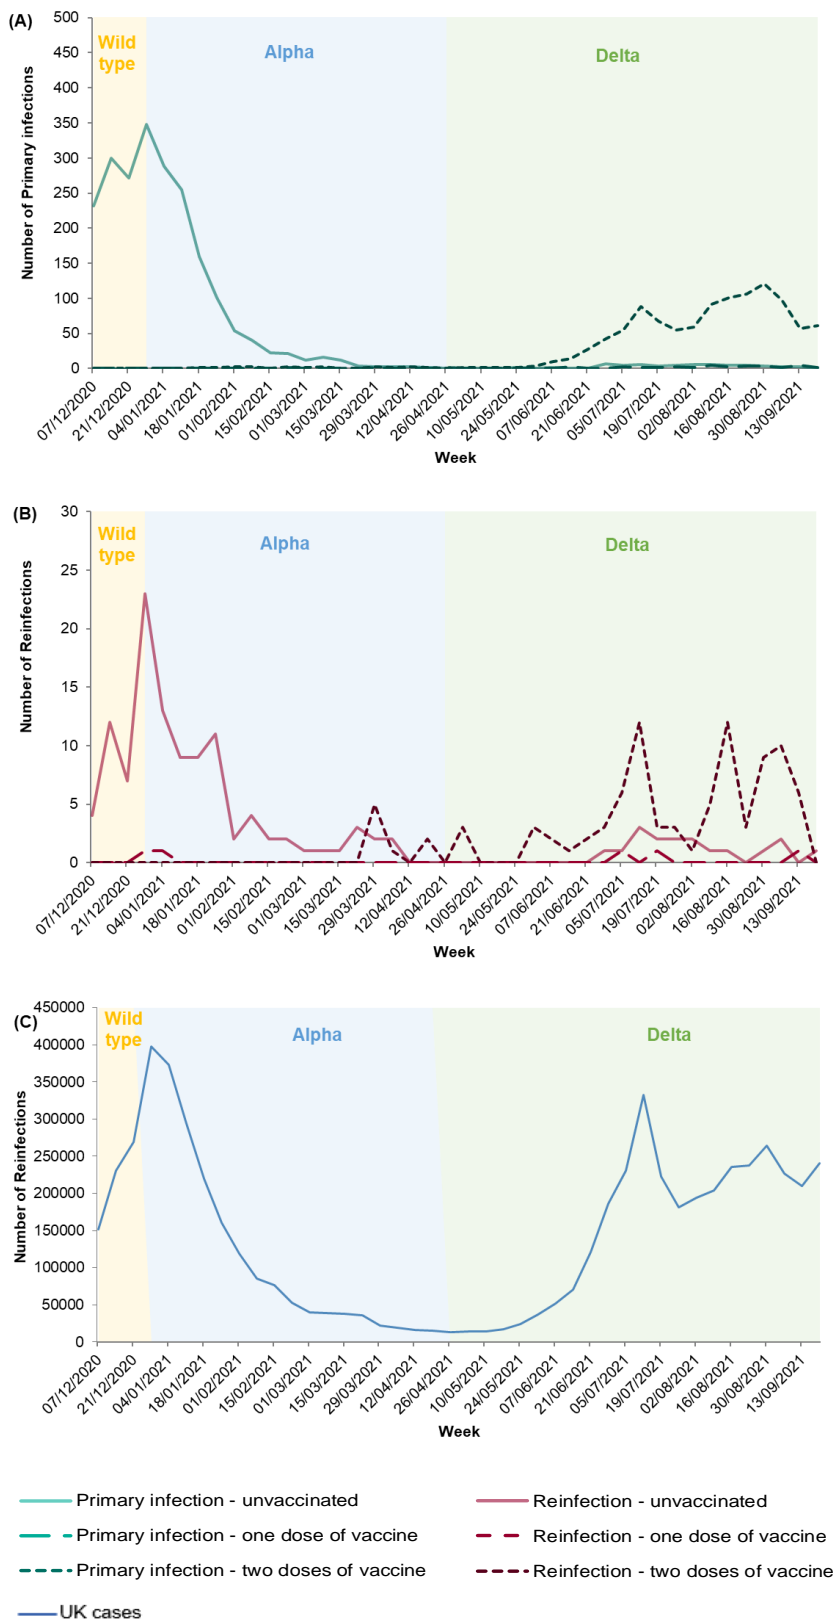

Data for panel C) Source: GOV.UK Coronavirus (COVID-19) in the UK





**Table S3: description of participant demographics, by cohort assignment and vaccine status at the end of the analysis period, June 2020 to September 2021**

| Demographics                       | Total        | SARS-CoV-2 previously uninfected cohort |              |             |              | SARS-CoV-2 previously infected cohort |             |            |              |  |
|------------------------------------|--------------|-----------------------------------------|--------------|-------------|--------------|---------------------------------------|-------------|------------|--------------|--|
|                                    |              | Dose 2 n (%)                            |              |             | Unvaccinated | Dose 2 n (%)                          |             |            | Unvaccinated |  |
|                                    |              | Pfizer short                            | Pfizer long  | ChAdOX1     |              | Pfizer short                          | Pfizer long | ChAdOX1    |              |  |
| <b>Gender</b>                      |              |                                         |              |             |              |                                       |             |            |              |  |
| Male                               | 5699 (15.9)  | 495 (20.2)                              | 3175 (15.2)  | 228 (12)    | 50 (10.8)    | 156 (25.6)                            | 1282 (17.7) | 112 (12.3) | 52 (12.1)    |  |
| Female                             | 30017 (83.9) | 1952 (79.7)                             | 17637 (84.6) | 1666 (87.9) | 410 (88.7)   | 453 (74.4)                            | 5942 (82.1) | 796 (87.7) | 375 (87.4)   |  |
| Other                              | 52 (0.1)     | 3 (0.1)                                 | 31 (0.1)     | 1 (0.1)     | 2 (0.4)      | -                                     | 11 (0.2)    | -          | 2 (0.5)      |  |
| <b>Age group</b>                   |              |                                         |              |             |              |                                       |             |            |              |  |
| Under 25                           | 1297 (3.6)   | 58 (2.4)                                | 748 (3.6)    | 69 (3.6)    | 31 (6.7)     | 21 (3.4)                              | 285 (3.9)   | 35 (3.9)   | 12 (2.8)     |  |
| 25 to 34                           | 7106 (19.9)  | 379 (15.5)                              | 3920 (18.8)  | 391 (20.6)  | 167 (36.1)   | 126 (20.7)                            | 1531 (21.2) | 184 (20.3) | 144 (33.6)   |  |
| 35 to 44                           | 8848 (24.7)  | 639 (26.1)                              | 5158 (24.7)  | 485 (25.6)  | 119 (25.8)   | 153 (25.1)                            | 1710 (23.6) | 219 (24.1) | 105 (24.5)   |  |
| 45 to 54                           | 10874 (30.4) | 781 (31.9)                              | 6410 (30.8)  | 564 (29.8)  | 90 (19.5)    | 194 (31.9)                            | 2213 (30.6) | 284 (31.3) | 95 (22.1)    |  |
| 55 to 64                           | 7085 (19.8)  | 533 (21.8)                              | 4255 (20.4)  | 357 (18.8)  | 50 (10.8)    | 106 (17.4)                            | 1419 (19.6) | 175 (19.3) | 67 (15.6)    |  |
| Over 65                            | 558 (1.6)    | 60 (2.4)                                | 352 (1.7)    | 29 (1.5)    | 5 (1.1)      | 9 (1.5)                               | 77 (1.1)    | 11 (1.2)   | 6 (1.4)      |  |
| <b>Ethnicity</b>                   |              |                                         |              |             |              |                                       |             |            |              |  |
| White                              | 31634 (88.4) | 2104 (85.9)                             | 18855 (90.5) | 1697 (89.6) | 386 (83.5)   | 492 (80.8)                            | 6174 (85.3) | 772 (85)   | 345 (80.4)   |  |
| Asian                              | 2486 (7)     | 228 (9.3)                               | 1204 (5.8)   | 96 (5.1)    | 28 (6.1)     | 81 (13.3)                             | 675 (9.3)   | 76 (8.4)   | 28 (6.5)     |  |
| Black                              | 621 (1.7)    | 31 (1.3)                                | 262 (1.3)    | 50 (2.6)    | 27 (5.8)     | 11 (1.8)                              | 152 (2.1)   | 34 (3.7)   | 34 (7.9)     |  |
| Mixed race                         | 535 (1.5)    | 43 (1.8)                                | 284 (1.4)    | 30 (1.6)    | 11 (2.4)     | 5 (0.8)                               | 115 (1.6)   | 14 (1.5)   | 17 (4)       |  |
| Other ethnic group                 | 427 (1.2)    | 40 (1.6)                                | 202 (1)      | 20 (1.1)    | 6 (1.3)      | 18 (3)                                | 110 (1.5)   | 10 (1.1)   | 4 (0.9)      |  |
| Prefer not to say                  | 65 (0.2)     | 4 (0.2)                                 | 36 (0.2)     | 2 (0.1)     | 4 (0.9)      | 2 (0.3)                               | 9 (0.1)     | 2 (0.2)    | 1 (0.2)      |  |
| <b>Medical conditions category</b> |              |                                         |              |             |              |                                       |             |            |              |  |
| No medical condition               | 26670 (74.6) | 1747 (71.3)                             | 15616 (74.9) | 1373 (72.5) | 360 (77.9)   | 443 (72.7)                            | 5409 (74.8) | 664 (73.1) | 348 (81.1)   |  |
| Immunosuppression                  | 803 (2.2)    | 88 (3.6)                                | 450 (2.2)    | 52 (2.7)    | 11 (2.4)     | 14 (2.3)                              | 135 (1.9)   | 16 (1.8)   | 12 (2.8)     |  |
| Chronic respiratory conditions     | 4439 (12.4)  | 337 (13.8)                              | 2577 (12.4)  | 262 (13.8)  | 49 (10.6)    | 66 (10.8)                             | 871 (12)    | 116 (12.8) | 36 (8.4)     |  |
| Chronic non-respiratory conditions | 3856 (10.8)  | 278 (11.3)                              | 2200 (10.6)  | 208 (11)    | 42 (9.1)     | 86 (14.1)                             | 820 (11.3)  | 112 (12.3) | 33 (7.7)     |  |

|                                                |              |             |              |             |            |            |             |            |            |
|------------------------------------------------|--------------|-------------|--------------|-------------|------------|------------|-------------|------------|------------|
| <b>Staff group</b>                             |              |             |              |             |            |            |             |            |            |
| Administrative/Executive (office based)        | 5434 (15.2)  | 255 (10.4)  | 3427 (16.4)  | 403 (21.3)  | 76 (16.5)  | 48 (7.9)   | 902 (12.5)  | 131 (14.4) | 48 (11.2)  |
| Nursing                                        | 12184 (34.1) | 886 (36.2)  | 6826 (32.7)  | 594 (31.3)  | 163 (35.3) | 230 (37.8) | 2653 (36.7) | 346 (38.1) | 175 (40.8) |
| Healthcare Assistant                           | 2901 (8.1)   | 135 (5.5)   | 1567 (7.5)   | 186 (9.8)   | 58 (12.6)  | 57 (9.4)   | 671 (9.3)   | 89 (9.8)   | 56 (13.1)  |
| Doctor                                         | 4248 (11.9)  | 589 (24)    | 2287 (11)    | 86 (4.5)    | 25 (5.4)   | 143 (23.5) | 910 (12.6)  | 72 (7.9)   | 35 (8.2)   |
| Midwife                                        | 777 (2.2)    | 46 (1.9)    | 457 (2.2)    | 52 (2.7)    | 16 (3.5)   | 9 (1.5)    | 152 (2.1)   | 20 (2.2)   | 10 (2.3)   |
| Physiotherapist/Occupational Therapist/SALT    | 1438 (4)     | 71 (2.9)    | 816 (3.9)    | 66 (3.5)    | 13 (2.8)   | 19 (3.1)   | 348 (4.8)   | 45 (5)     | 15 (3.5)   |
| Estates/Porters/Security                       | 530 (1.5)    | 27 (1.1)    | 304 (1.5)    | 30 (1.6)    | 14 (3)     | 7 (1.1)    | 100 (1.4)   | 20 (2.2)   | 7 (1.6)    |
| Pharmacist                                     | 737 (2.1)    | 70 (2.9)    | 463 (2.2)    | 29 (1.5)    | 4 (0.9)    | 14 (2.3)   | 111 (1.5)   | 15 (1.7)   | 9 (2.1)    |
| Healthcare Scientist                           | 1390 (3.9)   | 42 (1.7)    | 978 (4.7)    | 74 (3.9)    | 20 (4.3)   | 6 (1)      | 191 (2.6)   | 24 (2.6)   | 13 (3)     |
| Student (Medical/Nursing/Midwifery/Other)      | 1200 (3.4)   | 41 (1.7)    | 709 (3.4)    | 81 (4.3)    | 17 (3.7)   | 16 (2.6)   | 259 (3.6)   | 37 (4.1)   | 11 (2.6)   |
| Other                                          | 4929 (13.8)  | 288 (11.8)  | 3009 (14.4)  | 294 (15.5)  | 56 (12.1)  | 60 (9.9)   | 938 (13)    | 109 (12)   | 50 (11.7)  |
| <b>Occupational setting</b>                    |              |             |              |             |            |            |             |            |            |
| Office based                                   | 7002 (19.6)  | 363 (14.8)  | 4402 (21.1)  | 501 (26.4)  | 77 (16.7)  | 80 (13.1)  | 1208 (16.7) | 149 (16.4) | 47 (11)    |
| Patient facing (non-clinical)                  | 1378 (3.9)   | 102 (4.2)   | 829 (4)      | 81 (4.3)    | 19 (4.1)   | 19 (3.1)   | 240 (3.3)   | 26 (2.9)   | 17 (4)     |
| Outpatient                                     | 7341 (20.5)  | 527 (21.5)  | 4524 (21.7)  | 365 (19.3)  | 111 (24)   | 96 (15.8)  | 1266 (17.5) | 165 (18.2) | 88 (20.5)  |
| Maternity/Labour Ward                          | 477 (1.3)    | 37 (1.5)    | 282 (1.4)    | 24 (1.3)    | 8 (1.7)    | 13 (2.1)   | 80 (1.1)    | 11 (1.2)   | 7 (1.6)    |
| Ambulance/Emergency Department/Inpatient Wards | 6456 (18)    | 495 (20.2)  | 3309 (15.9)  | 225 (11.9)  | 85 (18.4)  | 154 (25.3) | 1685 (23.3) | 191 (21)   | 115 (26.8) |
| Intensive Care                                 | 1669 (4.7)   | 179 (7.3)   | 962 (4.6)    | 73 (3.9)    | 28 (6.1)   | 30 (4.9)   | 306 (4.2)   | 36 (4)     | 15 (3.5)   |
| Theatres                                       | 866 (2.4)    | 101 (4.1)   | 506 (2.4)    | 29 (1.5)    | 8 (1.7)    | 26 (4.3)   | 150 (2.1)   | 19 (2.1)   | 5 (1.2)    |
| Other                                          | 10579 (29.6) | 646 (26.4)  | 6029 (28.9)  | 597 (31.5)  | 126 (27.3) | 191 (31.4) | 2300 (31.8) | 311 (34.3) | 135 (31.5) |
| <b>Patient contact</b>                         |              |             |              |             |            |            |             |            |            |
| No                                             | 5105 (14.3)  | 209 (8.5)   | 3311 (15.9)  | 350 (18.5)  | 59 (12.8)  | 54 (8.9)   | 807 (11.2)  | 122 (13.4) | 40 (9.3)   |
| Yes                                            | 30663 (85.7) | 2241 (91.5) | 17532 (84.1) | 1545 (81.5) | 403 (87.2) | 555 (91.1) | 6428 (88.8) | 786 (86.6) | 389 (90.7) |
| <b>Frequency of COVID-19 patient contact</b>   |              |             |              |             |            |            |             |            |            |
| Never                                          | 12752 (35.7) | 674 (27.5)  | 8363 (40.1)  | 852 (45)    | 145 (31.4) | 118 (19.4) | 1896 (26.2) | 273 (30.1) | 104 (24.2) |
| Every day                                      | 8797 (24.6)  | 706 (28.8)  | 4218 (20.2)  | 394 (20.8)  | 135 (29.2) | 227 (37.3) | 2435 (33.7) | 282 (31.1) | 158 (36.8) |
| Once week                                      | 6229 (17.4)  | 511 (20.9)  | 3396 (16.3)  | 252 (13.3)  | 79 (17.1)  | 150 (24.6) | 1430 (19.8) | 161 (17.7) | 83 (19.3)  |
| Once month                                     | 3257 (9.1)   | 234 (9.6)   | 1903 (9.1)   | 143 (7.5)   | 42 (9.1)   | 59 (9.7)   | 671 (9.3)   | 82 (9)     | 41 (9.6)   |
| Less month                                     | 4733 (13.2)  | 325 (13.3)  | 2963 (14.2)  | 254 (13.4)  | 61 (13.2)  | 55 (9)     | 803 (11.1)  | 110 (12.1) | 43 (10)    |

| <b>Index of Multiple Deprivation</b> |              |             |              |             |            |            |             |            |            |
|--------------------------------------|--------------|-------------|--------------|-------------|------------|------------|-------------|------------|------------|
| 5 (least deprived)                   | 8871 (24.8)  | 672 (27.4)  | 5350 (25.7)  | 383 (20.2)  | 72 (15.6)  | 162 (26.6) | 1823 (25.2) | 194 (21.4) | 82 (19.1)  |
| 4                                    | 8073 (22.6)  | 569 (23.2)  | 4771 (22.9)  | 473 (25)    | 82 (17.7)  | 147 (24.1) | 1633 (22.6) | 179 (19.7) | 86 (20)    |
| 3                                    | 7515 (21)    | 505 (20.6)  | 4482 (21.5)  | 403 (21.3)  | 78 (16.9)  | 123 (20.2) | 1501 (20.7) | 229 (25.2) | 74 (17.2)  |
| 2                                    | 6020 (16.8)  | 363 (14.8)  | 3532 (16.9)  | 362 (19.1)  | 84 (18.2)  | 95 (15.6)  | 1225 (16.9) | 165 (18.2) | 74 (17.2)  |
| 1 (most deprived)                    | 3858 (10.8)  | 238 (9.7)   | 2037 (9.8)   | 245 (12.9)  | 97 (21)    | 63 (10.3)  | 875 (12.1)  | 130 (14.3) | 77 (17.9)  |
| Not known                            | 1431 (4)     | 103 (4.2)   | 671 (3.2)    | 29 (1.5)    | 49 (10.6)  | 19 (3.1)   | 178 (2.5)   | 11 (1.2)   | 36 (8.4)   |
| <b>Geographical area</b>             |              |             |              |             |            |            |             |            |            |
| East Midlands                        | 2825 (7.9)   | 263 (10.7)  | 1308 (6.3)   | 335 (17.7)  | 28 (6.1)   | 61 (10)    | 606 (8.4)   | 138 (15.2) | 34 (7.9)   |
| East of England                      | 3363 (9.4)   | 127 (5.2)   | 2056 (9.9)   | 168 (8.9)   | 23 (5)     | 33 (5.4)   | 793 (11)    | 62 (6.8)   | 40 (9.3)   |
| London                               | 3688 (10.3)  | 283 (11.6)  | 1913 (9.2)   | 127 (6.7)   | 62 (13.4)  | 115 (18.9) | 944 (13)    | 98 (10.8)  | 65 (15.2)  |
| North East                           | 647 (1.8)    | 84 (3.4)    | 333 (1.6)    | 26 (1.4)    | 3 (0.6)    | 20 (3.3)   | 146 (2)     | 14 (1.5)   | 9 (2.1)    |
| North West                           | 3429 (9.6)   | 281 (11.5)  | 1432 (6.9)   | 371 (19.6)  | 52 (11.3)  | 85 (14)    | 882 (12.2)  | 193 (21.3) | 58 (13.5)  |
| South East                           | 3548 (9.9)   | 260 (10.6)  | 2139 (10.3)  | 112 (5.9)   | 23 (5)     | 83 (13.6)  | 782 (10.8)  | 63 (6.9)   | 28 (6.5)   |
| South West                           | 5540 (15.5)  | 285 (11.6)  | 3843 (18.4)  | 246 (13)    | 58 (12.6)  | 58 (9.5)   | 820 (11.3)  | 87 (9.6)   | 37 (8.6)   |
| West Midlands                        | 2717 (7.6)   | 111 (4.5)   | 1563 (7.5)   | 158 (8.3)   | 41 (8.9)   | 24 (3.9)   | 630 (8.7)   | 102 (11.2) | 39 (9.1)   |
| Yorkshire and Humber                 | 2644 (7.4)   | 149 (6.1)   | 1420 (6.8)   | 144 (7.6)   | 31 (6.7)   | 42 (6.9)   | 703 (9.7)   | 80 (8.8)   | 43 (10)    |
| Scotland                             | 5449 (15.2)  | 428 (17.5)  | 3908 (18.7)  | 173 (9.1)   | 91 (19.7)  | 50 (8.2)   | 645 (8.9)   | 56 (6.2)   | 37 (8.6)   |
| Northern Ireland                     | 1127 (3.2)   | 78 (3.2)    | 487 (2.3)    | 7 (0.4)     | 48 (10.4)  | 10 (1.6)   | 121 (1.7)   | 4 (0.4)    | 29 (6.8)   |
| Wales                                | 791 (2.2)    | 101 (4.1)   | 441 (2.1)    | 28 (1.5)    | 2 (0.4)    | 28 (4.6)   | 163 (2.3)   | 11 (1.2)   | 10 (2.3)   |
| <b>Total</b>                         | <b>35768</b> | <b>2450</b> | <b>20843</b> | <b>1895</b> | <b>462</b> | <b>609</b> | <b>7235</b> | <b>908</b> | <b>429</b> |

\*Index of Multiple Deprivation (IMD), which is a measure of neighbourhood relative deprivation calculated by the Office of National Statistics, was obtained through linkage with participant postcodes; For ease of presentation, we have excluded participants who only received dose-1 (n=630 in the native cohort and n=307 in the positive cohort). Please note that this table presents and compared the demographics for the small number of participants who remained unvaccinated at the end of the analysis period, however, almost all participants contributed unvaccinated follow-up time to this analysis.

**Table S4: Incidence of SARS-CoV-2 reinfections and durability of protection against SARS-CoV-2 infection, adjusted for vaccine status, in the SIREN cohort between 07 December 2020 and 21 September 2021 – previously uninfected cohort only**

|                         | <b>Hazard ratio</b> | <b>95% confidence interval</b> |
|-------------------------|---------------------|--------------------------------|
| <b>Vaccine status</b>   |                     |                                |
| Unvaccinated            | Ref                 | -                              |
| d1 0-20 PF              | 0.72                | (0.63-0.83)                    |
| d1 21-27 PF             | 0.41                | (0.29-0.58)                    |
| d1 28-41 PF             | 0.34                | (0.24-0.48)                    |
| d1 42-55 PF             | 0.30                | (0.19-0.46)                    |
| d1 56+ PF               | 0.37                | (0.25-0.54)                    |
| d1 0-20 AZ              | 0.45                | (0.29-0.70)                    |
| d1 21-27 AZ             | 0.37                | (0.08-1.80)                    |
| d1 28-41 AZ             | 0.15                | (0.03-0.84)                    |
| d1 42-55 AZ             | 0.68                | (0.25-1.87)                    |
| d1 56+ AZ               | 0.91                | (0.45-1.87)                    |
| d2 0-13 PF long         | 0.21                | (0.10-0.44)                    |
| d2 14-73 PF long        | 0.15                | (0.08-0.28)                    |
| d2 74-133 PF long       | 0.34                | (0.25-0.47)                    |
| d2 134-193 PF long      | 0.32                | (0.23-0.46)                    |
| d2 194+ PF long         | 0.49                | (0.31-0.78)                    |
| d2 0-13 PF short        | 0.25                | (0.14-0.43)                    |
| d2 14-73 PF short       | 0.11                | (0.06-0.22)                    |
| d2 74-133 PF short      | 0.42                | (0.21-0.82)                    |
| d2 134-193 PF short     | 0.50                | (0.33-0.74)                    |
| d2 194+ PF short        | 0.47                | (0.31-0.72)                    |
| d2 14-73 AZ             | 0.42                | (0.23-0.77)                    |
| d2 74-133 AZ            | 0.50                | (0.35-0.71)                    |
| d2 134+ AZ              | 0.28                | (0.13-0.61)                    |
| <b>Gender</b>           |                     |                                |
| Male                    | Ref                 | -                              |
| Female                  | 0.91                | (0.79-1.03)                    |
| Non-binary              | 0.49                | (0.07-3.61)                    |
| Prefer not to say       | 0.30                | (0.03-2.67)                    |
| <b>Ethnicity groups</b> |                     |                                |
| White                   | Ref                 | -                              |
| Mixed Race              | 0.89                | (0.68-1.16)                    |
| Asian                   | 1.26                | (1.08-1.47)                    |
| Black                   | 1.79                | (1.37-2.33)                    |
| Other ethnic group      | 0.84                | (0.59-1.21)                    |
| Prefer not to say       | 1.38                | (0.64-3.01)                    |

**Table S5: Incidence of SARS-CoV-2 reinfections and durability of protection against SARS-CoV-2 infection, adjusted for vaccine status, in the SIREN cohort between 07 December 2020 and 21 September 2021 – both cohorts**

|                             | <b>Hazard ratio</b> | <b>95% confidence interval</b> |
|-----------------------------|---------------------|--------------------------------|
| <b>Vaccine status</b>       |                     |                                |
| d1 0-20 naive               | 0.95                | (0.83-1.09)                    |
| d1 21+ naive                | 0.47                | (0.38-0.59)                    |
| d2 0-13 naive               | 0.29                | (0.17-0.48)                    |
| d2 14-73 naive              | 0.13                | (0.07-0.23)                    |
| d2 73-133 naive             | 0.35                | (0.26-0.46)                    |
| d2 133-193 naive            | 0.37                | (0.29-0.49)                    |
| d2 193+ naive               | 0.53                | (0.38-0.75)                    |
| Unvaccinated infection <1yr | 0.14                | (0.11-0.19)                    |
| d1 0-20 infection <1yr      | 0.14                | (0.10-0.21)                    |
| d1 21+ infection <1yr       | 0.08                | (0.05-0.14)                    |
| d2 0-13 infection <1yr      | 0.12                | (0.04-0.39)                    |
| d2 14-73 infection <1yr     | 0.16                | (0.08-0.33)                    |
| d2 73-133 infection <1yr    | 0.08                | (0.04-0.17)                    |
| d2 133-193 infection <1yr   | 0.08                | (0.05-0.15)                    |
| d2 193+ infection <1yr      | 0.14                | (0.03-0.73)                    |
| Unvaccinated infection >1yr | 0.31                | (0.16-0.62)                    |
| d1 21+ infection >1yr       | 0.06                | (0.01-0.38)                    |
| d2 0-13 infection >1yr      | 0.24                | (0.03-1.83)                    |
| d2 14-73 infection >1yr     | 0.06                | (0.01-0.25)                    |
| d2 73-133 infection >1yr    | 0.03                | (0.02-0.07)                    |
| d2 133-193 infection >1yr   | 0.07                | (0.04-0.11)                    |
| d2 193+ infection >1yr      | 0.05                | (0.01-0.18)                    |
| <b>Gender</b>               |                     |                                |
| Male                        | Ref                 | -                              |
| Female                      | 0.90                | (0.78-1.03)                    |
| Non-binary                  | 0.41                | (0.06-2.98)                    |
| Prefer not to say           | 0.26                | (0.03-2.22)                    |
| <b>Ethnicity groups</b>     |                     |                                |
| White                       | Ref                 | -                              |
| Mixed Race                  | 0.93                | (0.70-1.23)                    |
| Asian                       | 1.24                | (1.04-1.48)                    |
| Black                       | 1.68                | (1.30-2.16)                    |
| Other ethnic group          | 0.87                | (0.60-1.27)                    |
| Prefer not to say           | 1.30                | (0.56-2.98)                    |

## **SUPPLEMENTARY SENSITIVITY ANALYSES**

We performed sensitivity analyses for:

1. delayed entry bias,
2. depletion-of-susceptibles bias,
3. using the date of the first positive antibody test as a proxy for primary infection date for participants excluded in the main text analysis.

As we have two (very similar) models, we have a total of 6 supplementary tables, organised in the folders named after the corresponding sensitivity analysis. We briefly explain how the analysis was performed in the corresponding sections, and we welcome request for annotated code (the code for the main model has been provided via GitHub).

All analyses gave results compatible with the models presented in the main text, but with more uncertain estimates. We reported hazard ratios (HR), protection from infection can be calculated as  $VE=1-HR$ .

### Supplementary sensitivity analysis 1:

This is a sensitivity analysis to assess if having delayed entry in our cohort-study is biasing our estimates. For this sensitivity analysis we only consider participants who were enrolled at the beginning of analysis time (Dec 7<sup>th</sup>). Delayed entry is therefore removed, and we obtain comparable (but more uncertain) estimates. When hazard ratios and corresponding CI bounds are 0.00, those estimates did not converge.

The below table is relative to the naïve and positive cohort and ChAdOx1 recipients are excluded from the model.

**Table S6. Output of sensitivity analysis assessing impact of delayed entry. Positive and Naïve cohort.**

| _t                 | Haz. Ratio | [95% Conf. Interval] |      |
|--------------------|------------|----------------------|------|
| x                  |            |                      |      |
| d1 0-20 naïve      | 0.98       | 0.86                 | 1.12 |
| d1 21+ naïve       | 0.45       | 0.35                 | 0.59 |
| d2 0-13 naïve      | 0.30       | 0.18                 | 0.50 |
| d2 14-73 naïve     | 0.17       | 0.08                 | 0.34 |
| d2 73-133 naïve    | 0.25       | 0.17                 | 0.37 |
| d2 133-193 naïve   | 0.35       | 0.25                 | 0.49 |
| d2 193+ naïve      | 0.45       | 0.28                 | 0.74 |
| Unvaccinated       | 0.14       | 0.10                 | 0.19 |
| inf<1yr            |            |                      |      |
| d1 0-20 inf<1yr    | 0.15       | 0.10                 | 0.21 |
| d1 21+ inf<1yr     | 0.08       | 0.05                 | 0.15 |
| d2 0-13 inf<1yr    | 0.10       | 0.02                 | 0.41 |
| d2 14-73 inf<1yr   | 0.00       | 0.00                 | 0.00 |
| d2 73-133 inf<1yr  | 0.08       | 0.03                 | 0.23 |
| d2 133-193 inf<1yr | 0.10       | 0.04                 | 0.25 |
| d2 193+ inf<1yr    | 0.00       | 0.00                 | 0.00 |
| Unvaccinated       | 0.30       | 0.15                 | 0.61 |
| inf>1yr            |            |                      |      |
| d1 21+ inf>1yr     | 0.00       | 0.00                 | 0.00 |
| d2 0-13 inf>1yr    | 0.22       | 0.03                 | 1.72 |
| d2 14-73 inf>1yr   | 0.04       | 0.01                 | 0.29 |
| d2 73-133 inf>1yr  | 0.03       | 0.01                 | 0.06 |
| d2 133-193 inf>1yr | 0.04       | 0.02                 | 0.09 |
| d2 193+ inf>1yr    | 0.08       | 0.02                 | 0.33 |
| GENDER             |            |                      |      |
| Female             | 0.94       | 0.80                 | 1.10 |
| Non-binary         | 0.52       | 0.08                 | 3.54 |
| Prefer not to say  | 0.45       | 0.04                 | 4.66 |
| ETHNIC_GR          |            |                      |      |
| Mixed_Race         | 0.96       | 0.70                 | 1.32 |
| Asian              | 1.30       | 1.06                 | 1.59 |
| Black              | 1.78       | 1.34                 | 2.35 |
| Other_Ethnic_Group | 0.96       | 0.67                 | 1.38 |
| Prefer_not         | 1.42       | 0.57                 | 3.54 |

The below table is relative to the previously uninfected cohort only.

**Table S7. Output of sensitivity analysis assessing impact of delayed entry. Previously uninfected cohort.**

| _t                  | Haz. Ratio | [95% Conf. Interval] |      |
|---------------------|------------|----------------------|------|
| x                   |            |                      |      |
| d1 0-20 PF          | 0.74       | 0.64                 | 0.85 |
| d1 21-27 PF         | 0.42       | 0.30                 | 0.60 |
| d1 28-41 PF         | 0.33       | 0.22                 | 0.47 |
| d1 42-55 PF         | 0.27       | 0.16                 | 0.46 |
| d1 56+ PF           | 0.29       | 0.16                 | 0.52 |
| d1 0-20 AZ          | 0.44       | 0.28                 | 0.69 |
| d1 21-27 AZ         | 0.40       | 0.07                 | 2.16 |
| d1 28-41 AZ         | 0.16       | 0.03                 | 0.90 |
| d1 42-55 AZ         | 0.60       | 0.21                 | 1.75 |
| d1 56+ AZ           | 0.82       | 0.40                 | 1.68 |
| d2 0-13 PF_long     | 0.22       | 0.08                 | 0.61 |
| d2 14-73 PF_long    | 0.15       | 0.05                 | 0.42 |
| d2 74-133 PF_long   | 0.26       | 0.18                 | 0.39 |
| d2 134-193 PF_long  | 0.32       | 0.22                 | 0.46 |
| d2 194+ PF_long     | 0.61       | 0.33                 | 1.11 |
| d2 0-13 PF_short    | 0.25       | 0.14                 | 0.45 |
| d2 14-73 PF_short   | 0.11       | 0.06                 | 0.23 |
| d2 74-133 PF_short  | 0.18       | 0.04                 | 0.81 |
| d2 134-193 PF_short | 0.46       | 0.25                 | 0.86 |
| d2 194+ PF_short    | 0.37       | 0.22                 | 0.61 |
| d2 14-73 AZ         | 0.32       | 0.12                 | 0.84 |
| d2 74-133 AZ        | 0.45       | 0.27                 | 0.75 |
| d2 134+ AZ          | 0.23       | 0.09                 | 0.56 |
| GENDER              |            |                      |      |
| Female              | 0.94       | 0.81                 | 1.10 |
| Non-binary          | 0.62       | 0.09                 | 4.30 |
| Prefer not to say   | 0.52       | 0.05                 | 5.86 |
| ETHNIC_GR           |            |                      |      |
| Mixed_Race          | 0.87       | 0.65                 | 1.18 |
| Asian               | 1.31       | 1.11                 | 1.55 |
| Black               | 1.88       | 1.42                 | 2.49 |
| Other_Ethnic_Group  | 0.89       | 0.62                 | 1.27 |
| Prefer_not          | 1.43       | 0.61                 | 3.34 |



## Supplementary sensitivity analysis 2.

We ran a sensitivity analysis to assess if our estimates suffer from depletion-of-susceptible bias, that can cause the observation of a spurious waning of protection. We stopped follow up time at July 31<sup>st</sup>. Results are very similar to those presented in the main text in the sense that show comparable waning. When hazard ratios and corresponding CI bounds are 0.00, those estimates did not converge.

The below table is relative to the naïve and positive cohort and ChAdOx1 recipients are excluded from the model.

**Table S8. Output of sensitivity analysis assessing depletion-of- susceptibles bias. both cohorts**

| _t<br>x            | Haz. Ratio | [95% Conf. Interval] |      |
|--------------------|------------|----------------------|------|
| d1 0-20 naïve      | 0.94       | 0.82                 | 1.08 |
| d1 21+ naïve       | 0.44       | 0.35                 | 0.56 |
| d2 0-13 naïve      | 0.27       | 0.16                 | 0.46 |
| d2 14-73 naïve     | 0.12       | 0.06                 | 0.21 |
| d2 73-133 naïve    | 0.39       | 0.28                 | 0.54 |
| d2 133-193 naïve   | 0.45       | 0.31                 | 0.64 |
| d2 193+ naïve      | 0.58       | 0.29                 | 1.16 |
| Unvaccinated       | 0.15       | 0.11                 | 0.19 |
| inf<1yr            |            |                      |      |
| d1 0-20 inf<1yr    | 0.14       | 0.10                 | 0.21 |
| d1 21+ inf<1yr     | 0.09       | 0.05                 | 0.15 |
| d2 0-13 inf<1yr    | 0.13       | 0.04                 | 0.41 |
| d2 14-73 inf<1yr   | 0.19       | 0.09                 | 0.37 |
| d2 73-133 inf<1yr  | 0.10       | 0.04                 | 0.23 |
| d2 133-193 inf<1yr | 0.14       | 0.03                 | 0.57 |
| d2 193+ inf<1yr    | 0.00       | 0.00                 | 0.00 |
| Unvaccinated       | 0.43       | 0.15                 | 1.19 |
| inf>1yr            |            |                      |      |
| d1 21+ inf>1yr     | 0.00       | 0.00                 | 0.00 |
| d2 0-13 inf>1yr    | 0.31       | 0.04                 | 2.44 |
| d2 14-73 inf>1yr   | 0.07       | 0.02                 | 0.31 |
| d2 73-133 inf>1yr  | 0.05       | 0.02                 | 0.09 |
| d2 133-193 inf>1yr | 0.11       | 0.04                 | 0.28 |
| d2 193+ inf>1yr    | 0.00       | 0.00                 | 0.00 |
| GENDER             |            |                      |      |
| Female             | 0.90       | 0.77                 | 1.05 |
| Non-binary         | 0.49       | 0.07                 | 3.70 |
| Prefer not to say  | 0.45       | 0.05                 | 3.76 |
| ETHNIC_GR          |            |                      |      |
| Mixed_Race         | 0.78       | 0.55                 | 1.12 |
| Asian              | 1.34       | 1.10                 | 1.62 |
| Black              | 1.76       | 1.34                 | 2.32 |
| Other_Ethnic_Group | 0.89       | 0.58                 | 1.37 |
| Prefer_not         | 0.86       | 0.31                 | 2.42 |

The below table is relative to the previously uninfected cohort only.

**Table S9. Output of sensitivity analysis assessing depletion-of- susceptibles bias. previously uninfected cohort**

| _t                  | Haz. Ratio | [95% Conf. Interval] |       |
|---------------------|------------|----------------------|-------|
| x                   |            |                      |       |
| d1 0-20 PF          | 0.72       | 0.62                 | 0.82  |
| d1 21-27 PF         | 0.40       | 0.29                 | 0.57  |
| d1 28-41 PF         | 0.32       | 0.22                 | 0.45  |
| d1 42-55 PF         | 0.27       | 0.17                 | 0.42  |
| d1 56+ PF           | 0.30       | 0.18                 | 0.49  |
| d1 0-20 AZ          | 0.44       | 0.29                 | 0.68  |
| d1 21-27 AZ         | 0.36       | 0.07                 | 1.83  |
| d1 28-41 AZ         | 0.14       | 0.03                 | 0.79  |
| d1 42-55 AZ         | 0.62       | 0.22                 | 1.70  |
| d1 56+ AZ           | 1.05       | 0.46                 | 2.41  |
| d2 0-13 PF_long     | 0.17       | 0.08                 | 0.37  |
| d2 14-73 PF_long    | 0.11       | 0.05                 | 0.24  |
| d2 74-133 PF_long   | 0.38       | 0.25                 | 0.58  |
| d2 134-193 PF_long  | 0.38       | 0.24                 | 0.60  |
| d2 0-13 PF_short    | 0.24       | 0.14                 | 0.43  |
| d2 14-73 PF_short   | 0.10       | 0.05                 | 0.21  |
| d2 74-133 PF_short  | 0.35       | 0.16                 | 0.76  |
| d2 134-193 PF_short | 0.60       | 0.36                 | 1.00  |
| d2 194+ PF_short    | 0.48       | 0.23                 | 1.01  |
| d2 14-73 AZ         | 0.42       | 0.23                 | 0.76  |
| d2 74-133 AZ        | 0.52       | 0.28                 | 0.95  |
| d2 134+ AZ          | 0.86       | 0.05                 | 14.41 |
| GENDER              |            |                      |       |
| Female              | 0.90       | 0.78                 | 1.04  |
| Non-binary          | 0.58       | 0.08                 | 4.34  |
| Prefer not to say   | 0.57       | 0.07                 | 4.87  |
| ETHNIC_GR           |            |                      |       |
| Mixed_Race          | 0.75       | 0.54                 | 1.05  |
| Asian               | 1.33       | 1.14                 | 1.57  |
| Black               | 1.88       | 1.44                 | 2.47  |
| Other_Ethnic_Group  | 0.88       | 0.58                 | 1.33  |
| Prefer_not          | 0.97       | 0.42                 | 2.27  |

### Supplementary sensitivity analysis 3.

We ran a sensitivity analysis to assess the impact of having excluded positive cohort participants without a reliable date of primary infection, whose positivity status has been ascertained via antibody testing. In the analysis we included these participants, using the date of their first positive antibody test as a proxy for the date of primary infection. Results are comparable with those presented in the main text. The below table is relative to the naïve and positive cohort and ChAdOx1 recipients are excluded from the model.

**Table S10. Output of sensitivity analysis assessing impact of excluding positive cohort participants without a reliable date of primary infection, both cohorts.**

| _t                 | Haz. Ratio | [95% Conf. Interval] |      |
|--------------------|------------|----------------------|------|
| x                  |            |                      |      |
| d1 0-20 naïve      | 0.95       | 0.83                 | 1.09 |
| d1 21+ naïve       | 0.47       | 0.38                 | 0.58 |
| d2 0-13 naïve      | 0.28       | 0.17                 | 0.48 |
| d2 14-73 naïve     | 0.12       | 0.07                 | 0.22 |
| d2 73-133 naïve    | 0.35       | 0.27                 | 0.45 |
| d2 133-193 naïve   | 0.37       | 0.28                 | 0.48 |
| d2 193+ naïve      | 0.52       | 0.37                 | 0.74 |
| Unvaccinated       | 0.16       | 0.13                 | 0.20 |
| inf<1yr            |            |                      |      |
| d1 0-20 inf<1yr    | 0.15       | 0.10                 | 0.22 |
| d1 21+ inf<1yr     | 0.11       | 0.07                 | 0.17 |
| d2 0-13 inf<1yr    | 0.17       | 0.06                 | 0.50 |
| d2 14-73 inf<1yr   | 0.21       | 0.12                 | 0.37 |
| d2 73-133 inf<1yr  | 0.09       | 0.05                 | 0.16 |
| d2 133-193 inf<1yr | 0.07       | 0.04                 | 0.12 |
| d2 193+ inf<1yr    | 0.10       | 0.02                 | 0.57 |
| Unvaccinated       | 0.25       | 0.13                 | 0.51 |
| inf>1yr            |            |                      |      |
| d1 21+ inf>1yr     | 0.05       | 0.01                 | 0.29 |
| d2 0-13 inf>1yr    | 0.20       | 0.03                 | 1.51 |
| d2 14-73 inf>1yr   | 0.05       | 0.01                 | 0.21 |
| d2 73-133 inf>1yr  | 0.05       | 0.03                 | 0.09 |
| d2 133-193 inf>1yr | 0.06       | 0.04                 | 0.10 |
| d2 193+ inf>1yr    | 0.04       | 0.01                 | 0.14 |
| GENDER             |            |                      |      |
| Female             | 0.90       | 0.78                 | 1.04 |
| Non-binary         | 0.38       | 0.05                 | 2.73 |
| Prefer not to say  | 0.25       | 0.03                 | 2.15 |
| ETHNIC_GR          |            |                      |      |
| Mixed_Race         | 0.92       | 0.69                 | 1.22 |
| Asian              | 1.21       | 1.01                 | 1.44 |
| Black              | 1.71       | 1.31                 | 2.23 |
| Other_Ethnic_Group | 0.84       | 0.57                 | 1.23 |
| Prefer_not         | 1.24       | 0.54                 | 2.87 |

The below table is relative to the naïve cohort only.

**Table S11. Output of sensitivity analysis assessing impact of excluding positive cohort participants without a reliable date of primary infection. Previously uninfected cohort.**

| _t                  | Haz. Ratio | [95% Conf. Interval] |      |
|---------------------|------------|----------------------|------|
| x                   |            |                      |      |
| d1 0-20 PF          | 0.72       | 0.63                 | 0.83 |
| d1 21-27 PF         | 0.42       | 0.30                 | 0.58 |
| d1 28-41 PF         | 0.35       | 0.25                 | 0.49 |
| d1 42-55 PF         | 0.30       | 0.19                 | 0.46 |
| d1 56+ PF           | 0.39       | 0.27                 | 0.56 |
| d1 0-20 AZ          | 0.48       | 0.30                 | 0.77 |
| d1 21-27 AZ         | 0.38       | 0.08                 | 1.85 |
| d1 28-41 AZ         | 0.15       | 0.03                 | 0.85 |
| d1 42-55 AZ         | 0.71       | 0.26                 | 1.94 |
| d1 56+ AZ           | 0.88       | 0.43                 | 1.80 |
| d2 0-13 PF_long     | 0.21       | 0.10                 | 0.45 |
| d2 14-73 PF_long    | 0.15       | 0.08                 | 0.29 |
| d2 74-133 PF_long   | 0.35       | 0.26                 | 0.48 |
| d2 134-193 PF_long  | 0.33       | 0.24                 | 0.47 |
| d2 194+ PF_long     | 0.51       | 0.31                 | 0.82 |
| d2 0-13 PF_short    | 0.24       | 0.14                 | 0.43 |
| d2 14-73 PF_short   | 0.11       | 0.06                 | 0.22 |
| d2 74-133 PF_short  | 0.43       | 0.22                 | 0.85 |
| d2 134-193 PF_short | 0.51       | 0.34                 | 0.74 |
| d2 194+ PF_short    | 0.49       | 0.32                 | 0.75 |
| d2 14-73 AZ         | 0.42       | 0.23                 | 0.78 |
| d2 74-133 AZ        | 0.50       | 0.35                 | 0.72 |
| d2 134+ AZ          | 0.29       | 0.13                 | 0.63 |
| GENDER              |            |                      |      |
| Female              | 0.91       | 0.80                 | 1.04 |
| Non-binary          | 0.44       | 0.06                 | 3.26 |
| Prefer not to say   | 0.30       | 0.03                 | 2.61 |
| ETHNIC_GR           |            |                      |      |
| Mixed_Race          | 0.88       | 0.67                 | 1.15 |
| Asian               | 1.26       | 1.08                 | 1.47 |
| Black               | 1.78       | 1.37                 | 2.31 |
| Other_Ethnic_Group  | 0.87       | 0.62                 | 1.24 |
| Prefer_not          | 1.39       | 0.63                 | 3.06 |
